# Supplementary material for: MSF Paediatric Days: a step forward in operationalising ‘Humanitarian Paediatrics’
Source: PubMed Central journal article supplement — BMJ Paediatr Open. 2021 Sep 27;5(1):e001156. doi: 10.1136/bmjpo-2021-001156 (PMC8477328; doi:10.1136/bmjpo-2021-001156), 2021-09-27

# BMJ Paediatrics Open

BMJ Paediatrics Open is committed to open peer review. As part of this commitment we make the peer review history of every article we publish publicly available.

When an article is published we post the peer reviewers' comments and the authors' responses online. We also post the versions of the paper that were used during peer review. These are the versions that the peer review comments apply to.

The versions of the paper that follow are the versions that were submitted during the peer review process. They are not the versions of record or the final published versions. They should not be cited or distributed as the published version of this manuscript.

BMJ Paediatrics Open is an open access journal and the full, final, typeset and author-corrected version of record of the manuscript is available on our site with no access controls, subscription charges or pay-per-view fees (<http://bmjpaedsopen.bmj.com>).

If you have any questions on BMJ Paediatrics Open's open peer review process please email [info.bmjpo@bmj.com](mailto:info.bmjpo@bmj.com)

# BMJ Paediatrics Open

## MSF Paediatric days: A step forward in operationalizing 'Humanitarian Paediatrics'

|                               |                                                                                                                                                                                                                                                                                                                                                                                                                                                                                                                                                            |
|-------------------------------|------------------------------------------------------------------------------------------------------------------------------------------------------------------------------------------------------------------------------------------------------------------------------------------------------------------------------------------------------------------------------------------------------------------------------------------------------------------------------------------------------------------------------------------------------------|
| Journal:                      | <i>BMJ Paediatrics Open</i>                                                                                                                                                                                                                                                                                                                                                                                                                                                                                                                                |
| Manuscript ID                 | bmjpo-2021-001156                                                                                                                                                                                                                                                                                                                                                                                                                                                                                                                                          |
| Article Type:                 | Review                                                                                                                                                                                                                                                                                                                                                                                                                                                                                                                                                     |
| Date Submitted by the Author: | 25-Jun-2021                                                                                                                                                                                                                                                                                                                                                                                                                                                                                                                                                |
| Complete List of Authors:     | Janet, Sophie ; Medecins Sans Frontieres<br>Russell, Neal; Medecins Sans Frontieres<br>Morton, Nikola; Medecins Sans Frontieres<br>Martinez, Daniel; Medecins Sans Frontieres<br>Tamannai, Mona; Medecins Sans Frontieres<br>Lafferty, Nadia; Medecins Sans Frontieres<br>Ogundipe, Oluwakemi; Medecins Sans Frontieres<br>roggeveen, harriet; Medecins Sans Frontieres<br>Carreras, Inmaculada; Medecins Sans Frontieres<br>Gao, Anja; Medecins Sans Frontieres<br>Didier, Elise; Medecins Sans Frontieres<br>Petrucci, Roberta; Medecins Sans Frontieres |
| Keywords:                     | Neonatology                                                                                                                                                                                                                                                                                                                                                                                                                                                                                                                                                |
|                               |                                                                                                                                                                                                                                                                                                                                                                                                                                                                                                                                                            |

SCHOLARONE™  
Manuscripts

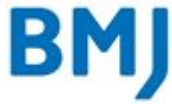

I, the Submitting Author has the right to grant and does grant on behalf of all authors of the Work (as defined in the below author licence), an exclusive licence and/or a non-exclusive licence for contributions from authors who are: i) UK Crown employees; ii) where BMJ has agreed a CC-BY licence shall apply, and/or iii) in accordance with the terms applicable for US Federal Government officers or employees acting as part of their official duties; on a worldwide, perpetual, irrevocable, royalty-free basis to BMJ Publishing Group Ltd ("BMJ") its licensees and where the relevant Journal is co-owned by BMJ to the co-owners of the Journal, to publish the Work in this journal and any other BMJ products and to exploit all rights, as set out in our [licence](#).

The Submitting Author accepts and understands that any supply made under these terms is made by BMJ to the Submitting Author unless you are acting as an employee on behalf of your employer or a postgraduate student of an affiliated institution which is paying any applicable article publishing charge ("APC") for Open Access articles. Where the Submitting Author wishes to make the Work available on an Open Access basis (and intends to pay the relevant APC), the terms of reuse of such Open Access shall be governed by a Creative Commons licence – details of these licences and which [Creative Commons](#) licence will apply to this Work are set out in our licence referred to above.

Other than as permitted in any relevant BMJ Author's Self Archiving Policies, I confirm this Work has not been accepted for publication elsewhere, is not being considered for publication elsewhere and does not duplicate material already published. I confirm all authors consent to publication of this Work and authorise the granting of this licence.

**TITLE:** MSF Paediatric days: A step forward in operationalizing 'Humanitarian Paediatrics'

**CORRESPONDING AUTHOR:** Sophie Janet, Médecins Sans Frontières Dakar Unit, Yoff  
Toundounp Rya Villa N° 127, Dakar / Sénégal. Email: Sophie.janet@barcelona.msf.org

**CO-AUTHORS:**

Neal Russell, medical department, Médecins Sans Frontières, Amsterdam, Netherlands  
Nikola Morton, medical department, Médecins Sans Frontières, Sydney, Australia  
Daniel Martinez, medical department, Médecins Sans Frontières, Geneva, Switzerland  
Mona Tamannai, medical department, Médecins Sans Frontières, Barcelona, Spain  
Nadia Lafferty, medical department, Médecins Sans Frontières, Barcelona, Spain  
Harriet Roggeveen, medical department, Médecins Sans Frontières, Amsterdam, Netherlands  
Oluwakemi F. Ogundipe, medical department, Médecins Sans Frontières, Brussels, Belgium  
Inmaculada Carreras, medical department, Médecins Sans Frontières, Sydney, Australia  
Anja Gao, medical department, Médecins Sans Frontières, Sydney, Australia  
Elise Didier, medical department, Médecins Sans Frontières, Brussels, Belgium  
Roberta Petrucci, medical department, Médecins Sans Frontières, Geneva, Switzerland

**KEYWORDS:** Humanitarian paediatrics, Essential Newborn Care, community care, paediatric tuberculosis, antimicrobial resistance

**WORD COUNT:** 2021 words

**REFERENCE COUNT:** 17 references

**KEY MESSAGES:**

- One in four children worldwide are living in a humanitarian or fragile setting.
- There is a distinct lack of medical literature from humanitarian settings to provide guidance on best practice in such specific and resource-limited contexts.
- MSF Paediatric Days were born to address paediatric issues of direct humanitarian concern.
- This event unites frontline staff, policy makers and academia to exchange ideas, align efforts, inspire, and share frontline research and experiences.
- Essential newborn care, community-based models of care, paediatric tuberculosis, antimicrobial resistance and collateral damage of COVID-19 on child health were discussed on the 2021 event.
- MSF Paediatric Days is as a unique forum to advance knowledge on humanitarian paediatrics and creates opportunities for individual and collective learning.

**STATEMENTS:**

- ❖ **Funding:** This research received no specific grant from any funding agency in the public, commercial or not-for-profit sectors
- ❖ **Competing Interests Statement:** The authors declare no conflicts of interests

❖ **Contributorship Statement:**

- Sophie Janet: substantial contributions to the conception, drafting of manuscript, revision, final approval and submission.
- Neal Russell: substantial contributions to the conception, revision and final approval.
- Nikola Morton: substantial contributions to the conception, revision and final approval.
- Daniel Martinez: substantial contributions to the conception, revision and final approval
- Mona Tamannai: substantial contributions to the conception, revision and final approval
- Nadia Lafferty: substantial contributions to the conception, revision and final approval
- Harriet Roggeveen: substantial contributions to the conception and final approval
- Oluwakemi F. Ogundipe: substantial contributions to the conception, revision and final approval
- Inmaculada Carreras: substantial contributions to the conception and final approval
- Anja Gao: substantial contributions to the conception and final approval
- Elise Didier: substantial contributions to the conception, revision and final approval
- Roberta Petrucci: substantial contributions to the conception, revision and final approval

1  
2  
3 Around the world, one in four children are living in a country affected by conflict, political  
4 insecurity and disaster, and an unprecedented 30-34 million children are displaced from home  
5 <sup>1</sup>. Children are disproportionately impacted by crises and face threats of violence, hunger,  
6 disease, disability, and death. Worldwide, 56 million children under the age of 5 (half of them  
7 newborns) are projected to die between 2018 and 2030 in the absence of additional action,  
8 with the greatest proportion of this burden in humanitarian and fragile settings<sup>2</sup>. Tragically,  
9 with a historic reversal of progress expected due to the collateral impact of the SARS-CoV-2  
10 pandemic, a rising gap between humanitarian needs and funding<sup>3</sup> and declining support for  
11 child health in many cases, the numbers of children dying is expected to increase even  
12 further<sup>4</sup>. In addition to increased mortality, we can expect escalating suffering, lost future  
13 potential, and increasing inequality<sup>5-7</sup>.

14  
15  
16 Médecins Sans Frontières (MSF) is an international medical humanitarian organization  
17 specializing in humanitarian emergencies such as conflicts, natural disasters, and epidemics,  
18 acting with independence, neutrality, and impartiality. In 2019, MSF operated in 268 projects  
19 across the world providing paediatric care. Around 3.3 million children received outpatient  
20 care, more than half a million children under five years old received inpatient care (including  
21 224,176 admitted in therapeutic feeding centres for severe malnutrition), and almost 300,000  
22 births were supported by MSF<sup>8</sup>.

23  
24  
25  
26  
27  
28 Health care in humanitarian and fragile contexts is challenging and complex to provide,  
29 particularly for children. Health care staff are scarce, under-resourced and work well over  
30 capacity, in some of the most insecure and adverse settings. Yet they continue to provide  
31 essential and life-saving services to vulnerable populations, rarely receiving the recognition  
32 they deserve. In addition, there is a distinct lack of medical literature from humanitarian  
33 settings to provide guidance on best practices in such specific and resource-limited contexts.  
34 There is a need not only to further integrate evidence-based practices into humanitarian  
35 contexts, but also to generate evidence on what works best in such settings. We need to shine  
36 a brighter light on the experiences, challenges, failures, and successes of those working in  
37 'humanitarian paediatrics' in order to improve care for this growing population of children in  
38 the most vulnerable circumstances. There are not many platforms or venues available to  
39 bridge the existing gaps in clinical research and medical literature applicable to paediatric and  
40 neonatal care in humanitarian and fragile settings. Therefore, in 2016, the first *MSF Paediatric*  
41 *Days* were born with the aim of addressing urgent paediatric issues of direct humanitarian  
42 concern. Since then, 3 more editions have taken place at 18 month intervals, successfully  
43 uniting frontline staff working in MSF and other organizations with policymakers and academia  
44 to exchange ideas, align efforts, inspire, and share pertinent research and experiences.

45  
46  
47  
48  
49  
50  
51 In April 2021, the first virtual edition of the *MSF Paediatric Days* brought together 1108 people  
52 from 95 different countries. MSF staff made up 58% of the attendees, largely frontline health  
53 workers, and the remainder came from a range of different organisations including academia,  
54 non-governmental organisations, ministries of health and other actors. The event included 5  
55 main plenary discussions around key topics on humanitarian paediatrics, 8 virtual stands from  
56 internal MSF initiatives ([MSF eCare project](#), [Telemedicine](#), [POCUS](#)) and external MSF  
57 collaborating partners (OPENPaediatrics, Save the Children, WHO, Laerdal & the American  
58 Academy of Paediatrics, Action Against Hunger, ALIMA and the Société Sénégalaise de  
59  
60

1  
2  
3 Pédiatrie) who shared content and interacted with the participants. Additionally, 49 posters  
4 (available on [ResearchGate](#)) and 21 respective video-abstracts were displayed with evidence  
5 coming directly from the hospitals and medical projects in fragile and humanitarian settings.  
6 This event provided a unique opportunity for frontline health staff working in humanitarian  
7 settings to share their experiences, challenges, and solutions, in addition to creating  
8 networking spaces for interaction and exchange of ideas. Moreover, 5 inspiring short talks  
9 referred to as “[PAEDTalks](#)” were made available, enriching the content of the event.  
10  
11

12  
13 During this 2-day event, 5 major themes were discussed: essential newborn care, community-  
14 based models of care, paediatric tuberculosis, antimicrobial resistance in neonatal and  
15 paediatric care and the collateral damage of the SARS-CoV-2 pandemic on child health. Replays  
16 and full event content can be found on the [MSF Paediatric Days webpage](#).  
17  
18

19 Newborns are one of the most vulnerable groups in humanitarian and fragile settings, but they  
20 have received limited focus in humanitarian action<sup>9</sup>. The first session entitled “**Neonates, back**  
21 **to basics**” illustrated the challenges that field teams face to implement, maintain, support and  
22 promote essential newborn care interventions, with a particular focus on breastfeeding.  
23 Breastfeeding has well recognised health benefits for mothers and newborns, but is even more  
24 crucial in humanitarian settings where breast milk substitutes (BMS) are particularly dangerous  
25 in the absence of adequate water, sanitation & hygiene (WaSH)<sup>10,11</sup>. Nevertheless, the life-  
26 saving nature of breastfeeding has often been overlooked in humanitarian settings, with lack  
27 of institutionalisation of guidance on supporting breastfeeding<sup>12</sup>. The session identified  
28 numerous barriers to successful breastfeeding such as false assumptions of breastfeeding  
29 being easy without need for support, contradictory messaging, and failure to maintain mothers  
30 and babies together (mother-baby dyad care) due to lack of adequate space, resources and  
31 staff knowledge and awareness. Moreover, gender inequity and female disempowerment,  
32 which are exacerbated in crises, also negatively influence breastfeeding practices in many of  
33 the contexts where MSF intervenes.  
34  
35  
36  
37  
38

39 There was a common recognition of the need for breastfeeding promotion and awareness  
40 raising, including the need for professionals with expertise in breastfeeding promotion to  
41 support humanitarian responses. Ultimately, breastfeeding support needs to be recognised as  
42 an emergency humanitarian intervention. Different solutions and ideas were shared during the  
43 panel discussion to overcome some of these current challenges and to achieve this important  
44 shift in paradigm. Improving knowledge and skills on breastfeeding for health care providers is  
45 crucial, and support from lactation specialists should be made available via innovative  
46 platforms such as Telemedicine\*. Engagement of all members of the community including  
47 traditional birth attendants, family (including male members) and any other key member of  
48 the community should be included in the community engagement strategy of the project.  
49  
50  
51

52  
53 The second session of the first day entitled “**Community-based models of care for neonatal**  
54 **and child health**” provided insight on the current challenges and achievements of the  
55 decentralisation of care and the important role that the community plays in the continuum of  
56 care. During the session, discussions highlighted the opportunity and importance of expanding  
57  
58

---

59 \*Telemedicine is an MSF service that allows remote medical teams to consult with a whole network of specialist  
60 whenever confronted with complex cases.

1  
2  
3 community models of care, for both children and newborns. The roles of Community Health  
4 Workers are crucial for delivering a range of preventive and curative health services and their  
5 contribution towards reducing inequities in access to care. It was highlighted that community  
6 activities should be built upon existing capacity and avoid the implementation of parallel  
7 systems.  
8  
9

10  
11 The integration of community models of care in emergency response is possible and most  
12 effective if the model is implemented in advance with standardised emergency preparedness  
13 (EPREP) strategies according to context to promote resilience. Field testimonies on an  
14 Integrated Community Case Management (ICCM) program in Niger and implementation of  
15 community-based nutrition programs among others reinforced the importance and the  
16 potential that community models of care have in improving access and the continuum of care  
17 in children.  
18  
19

20  
21 On the second day of the event 3 main topics were discussed., The first session on  
22 **paediatric tuberculosis** touched upon the challenges of diagnosing tuberculosis , the  
23 specificities of paediatric tuberculosis and the role of contact tracing and preventive  
24 treatment.  
25

26  
27 Tuberculosis (TB) is a major infectious killer in MSF settings and children, especially those  
28 under 5 years of age, are at particular risk of severe forms of the disease. Paediatric  
29 Tuberculosis is a “silent disease” frequently under-diagnosed, under-treated and under-  
30 reported. Tuberculosis presents differently in children than in adults, with a higher proportion  
31 of extra-pulmonary TB. Microbiological confirmation is rarely achievable in children and is  
32 especially challenging in humanitarian settings. Therefore, emphasis on clinical diagnosis is  
33 imperative to ensure that presumptive treatment is started without delay. Treatment of  
34 paediatric tuberculosis based on clinical diagnosis alone would decrease the burden of TB in  
35 children, thereby minimising preventable deaths from the disease.  
36  
37  
38

39  
40 Contact tracing of tuberculosis cases in the community and subsequent Tuberculosis  
41 Preventive Treatment (TPT) is often overlooked and deprioritised in low resource settings, but  
42 this should be pursued more actively. This can now be facilitated with new shorter TPT  
43 regimens (e.g. 3HR), which have already shown promising results in terms of acceptance,  
44 efficacy, safety and adherence to treatment within MSF settings.  
45

46  
47 The second topic discussed on April 16<sup>th</sup> was “**Antimicrobial resistance and antimicrobial**  
48 **stewardship in neonatal and paediatric care**”. Antimicrobial resistance is a reality in  
49 humanitarian settings and has been described as a silent tsunami (ref). Vulnerable groups such  
50 as newborns and malnourished children face a disproportionate burden and specific  
51 challenges. The challenges and consequences of outbreaks in neonatal units in low resource  
52 settings was highlighted, including both experience within MSF and a growing evidence based  
53 in low resource settings outside MSF<sup>14,15</sup>. In addition, MSF field experiences from Mali and  
54 South Sudan underlined the need of a multidisciplinary approach focusing on several  
55 transversal pillars including Infection Prevention and Control (IPC), Antibiotic stewardship and  
56 microbiology (when possible/available). Antibiotic stewardship is particularly challenging for  
57 paediatric patients in humanitarian settings, compounded by high mortality and lack of  
58  
59  
60



1  
2  
3 microbiology testing, meaning severe illness is often treated with diagnostic uncertainty,  
4 leading to an overuse of antibiotics. The challenge of access to microbiology was discussed, as  
5 while we have extensive data on antimicrobial resistance in some settings, there is a current  
6 gap in global data, and the important role this plays in defining the problem. But even without  
7 access to microbiology, there is capacity to improve antibiotic stewardship and IPC, which are  
8 essential and feasible in all settings<sup>16</sup>. The importance of an interdisciplinary approach was  
9 discussed, ensuring involvement of all members of the team, including doctors, nurses,  
10 pharmacists and cleaners. Practical tools to support field teams to assess and monitor medical  
11 activities from an antimicrobial resistance lens are available within and outside MSF such as  
12 Point Prevalence Surveys on antibiotic use, antibiotic consumption analysis and the Stepwise  
13 IPC Approach (SIPCA tool).  
14  
15  
16  
17

18 The last session of the event was dedicated to the **collateral damage of the SARS-CoV-2**  
19 **pandemic on child health**. Children have been disproportionately affected by the pandemic,  
20 with low mortality by COVID-19 itself, but high morbidity and mortality due to the multiple  
21 collateral effects of the health crisis. The pandemic has impacted child health through  
22 increases in poverty, loss of education, food insecurity, violence, as well as increased strain on  
23 health systems and reduction in access to health services. Preventive services like vaccination  
24 and nutrition programmes have been affected most by suspension or delay<sup>17</sup>. The indirect  
25 effects of the pandemic have struck most severely in resource-limited settings where increases  
26 in child mortality is a major concern, widening the gap of inequity for children. There were  
27 field testimonies from frontline health workers outlining the struggle they faced during this  
28 unprecedented time. Supporting health systems to maintain the preventive and curative  
29 services are crucial to attenuate the ongoing impact of this crisis. Flexibility to adjust health  
30 activities is key to face the challenges brought by the SARS-CoV-2 pandemic. Boosting  
31 community health care activities in MSF strategies, as an essential piece of the continuum of  
32 care, is an efficient way of assuring health access. Despite all collateral damage already caused,  
33 this past year can also be an opportunity to change our ways of thinking, activities, support  
34 models and future preparedness and responses. Now is a more important time than ever to  
35 invest in humanitarian paediatrics, to support children and uphold their rights in the most  
36 fragile contexts.  
37  
38  
39  
40  
41  
42

43 As the world continues to battle the SARS-CoV-2 pandemic, focus and funding for child health  
44 in humanitarian settings suffers while the needs escalate. The future for children in  
45 humanitarian settings hangs in the balance, and the need for platforms that raise the profile of  
46 humanitarian paediatrics is more important than ever. The MSF Paediatric Days serves as a  
47 unique forum to advance knowledge on humanitarian paediatrics and creates opportunities  
48 for individual and collective learning on this topic. We look forward to the next edition and  
49 welcome all suggestions for the next topics of the MSF Paediatric Days.  
50  
51  
52  
53  
54

## 55 References

- 56  
57 1. United Nations Office for the Coordination of Humanitarian Affairs. *Global*  
58 *Humanitarian Overview 2019*.  
59 <https://reliefweb.int/sites/reliefweb.int/files/resources/GHO2019.pdf> (2019).  
60

- 1
- 2
- 3 2. UNICEF. *Levels and trends in Child Mortality Report 2018*. (2018).
- 4
- 5 3. A.Spencer, B. W.-K. &. *Reducing the Humanitarian financing gap: Review of progress*
- 6 *since the report of the High-Level Panel on Humanitarian Financing*. (2021).
- 7
- 8 4. Robertson, T. *et al*. Early estimates of the indirect effects of the COVID-19 pandemic on
- 9 maternal and child mortality in low-income and middle-income countries: a modelling
- 10 study. *Lancet Glob. Heal.* **0**, (2020).
- 11
- 12 5. Wagner, Z. *et al*. Armed conflict and child mortality in Africa: a geospatial analysis.
- 13 *Lancet* **392**, 857–865 (2018).
- 14
- 15 6. Shenoda, S., Kadir, A., Pitterman, S. & Goldhagen, J. The effects of armed conflict on
- 16 children. *Pediatrics* **142**, (2018).
- 17
- 18 7. Pfefferbaum, B., Jacobs, A. K., Van Horn, R. L. & Houston, J. B. Effects of Displacement in
- 19 Children Exposed to Disasters. *Curr. Psychiatry Rep.* **18**, 1–5 (2016).
- 20
- 21 8. MSF Paediatric Working Group. Paediatric activities Medecins Sans Frontieres. (2019).
- 22
- 23 9. UNICEF, Save the Children, W. H. O. *Roadmap to Accelerate Progress for Every Newborn*
- 24 *in Humanitarian Settings 2020 – 2025*. (2020).
- 25
- 26 10. Jakobsen, M. *et al*. Breastfeeding status as a predictor of mortality among refugee
- 27 children in an emergency situation in Guinea-Bissau. *Trop. Med. Int. Heal.* **8**, 992–996
- 28 (2003).
- 29
- 30 11. Hipgrave, D. B., Assefa, F., Winoto, A. & Sukotjo, S. Donated breast milk substitutes and
- 31 incidence of diarrhoea among infants and young children after the May 2006
- 32 earthquake in Yogyakarta and Central Java. *Public Health Nutr.* **15**, 307–315 (2011).
- 33
- 34 12. Shaker-Berbari, L., Ghattas, H., Symon, A. G. & Anderson, A. S. Infant and young child
- 35 feeding in emergencies: Organisational policies and activities during the refugee crisis in
- 36 Lebanon. *Matern. Child Nutr.* **14**, e12576 (2018).
- 37
- 38 13. Dodd, P. J., Yuen, C. M., Sismanidis, C., Seddon, J. A. & Jenkins, H. E. The global burden
- 39 of tuberculosis mortality in children: a mathematical modelling study. *Lancet Glob.*
- 40 *Heal.* **5**, e898–e906 (2017).
- 41
- 42 14. Okomo, U. *et al*. Investigation of sequential outbreaks of Burkholderia cepacia and
- 43 multidrug-resistant extended spectrum  $\beta$ -lactamase producing Klebsiella species in a
- 44 West African tertiary hospital neonatal unit: a retrospective genomic analysis. *The*
- 45 *Lancet Microbe* **1**, e119–e129 (2020).
- 46
- 47 15. Lenglet, A., Faniyan, O. & Hopman, J. A Nosocomial Outbreak of Clinical Sepsis in a
- 48 Neonatal Care Unit (NCU) in Port-Au-Prince Haiti, July 2014 – September 2015. *PLoS*
- 49 *Curr.* (2018) doi:10.1371/currents.outbreaks.58723332ec0de952adef9a9b6905932.
- 50
- 51 16. Johnson, J. *et al*. Saving neonatal lives by improving infection prevention in low-
- 52 resource units: Tools are needed. *J. Glob. Health* **9**, 9–11 (2019).
- 53
- 54 17. Sidhu, S. WHO and UNICEF warn of a decline in vaccinations during COVID-19. *World*
- 55 *Health Organization* (2020).
- 56
- 57
- 58
- 59
- 60

# BMJ Paediatrics Open

## MSF Paediatric days: A step forward in operationalising 'Humanitarian Paediatrics'

|                               |                                                                                                                                                                                                                                                                                                                                                                                                                                                                                                                                                            |
|-------------------------------|------------------------------------------------------------------------------------------------------------------------------------------------------------------------------------------------------------------------------------------------------------------------------------------------------------------------------------------------------------------------------------------------------------------------------------------------------------------------------------------------------------------------------------------------------------|
| Journal:                      | <i>BMJ Paediatrics Open</i>                                                                                                                                                                                                                                                                                                                                                                                                                                                                                                                                |
| Manuscript ID                 | bmjpo-2021-001156.R1                                                                                                                                                                                                                                                                                                                                                                                                                                                                                                                                       |
| Article Type:                 | Review                                                                                                                                                                                                                                                                                                                                                                                                                                                                                                                                                     |
| Date Submitted by the Author: | 07-Aug-2021                                                                                                                                                                                                                                                                                                                                                                                                                                                                                                                                                |
| Complete List of Authors:     | Janet, Sophie ; Medecins Sans Frontieres<br>Russell, Neal; Medecins Sans Frontieres<br>Morton, Nikola; Medecins Sans Frontieres<br>Martinez, Daniel; Medecins Sans Frontieres<br>Tamannai, Mona; Medecins Sans Frontieres<br>Lafferty, Nadia; Medecins Sans Frontieres<br>roggeveen, harriet; Medecins Sans Frontieres<br>Ogundipe, Oluwakemi; Medecins Sans Frontieres<br>Carreras, Inmaculada; Medecins Sans Frontieres<br>Gao, Anja; Medecins Sans Frontieres<br>Didier, Elise; Medecins Sans Frontieres<br>Petrucci, Roberta; Medecins Sans Frontieres |
| Keywords:                     | Neonatology                                                                                                                                                                                                                                                                                                                                                                                                                                                                                                                                                |
|                               |                                                                                                                                                                                                                                                                                                                                                                                                                                                                                                                                                            |

SCHOLARONE™  
Manuscripts

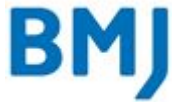

I, the Submitting Author has the right to grant and does grant on behalf of all authors of the Work (as defined in the below author licence), an exclusive licence and/or a non-exclusive licence for contributions from authors who are: i) UK Crown employees; ii) where BMJ has agreed a CC-BY licence shall apply, and/or iii) in accordance with the terms applicable for US Federal Government officers or employees acting as part of their official duties; on a worldwide, perpetual, irrevocable, royalty-free basis to BMJ Publishing Group Ltd ("BMJ") its licensees and where the relevant Journal is co-owned by BMJ to the co-owners of the Journal, to publish the Work in this journal and any other BMJ products and to exploit all rights, as set out in our [licence](#).

The Submitting Author accepts and understands that any supply made under these terms is made by BMJ to the Submitting Author unless you are acting as an employee on behalf of your employer or a postgraduate student of an affiliated institution which is paying any applicable article publishing charge ("APC") for Open Access articles. Where the Submitting Author wishes to make the Work available on an Open Access basis (and intends to pay the relevant APC), the terms of reuse of such Open Access shall be governed by a Creative Commons licence – details of these licences and which [Creative Commons](#) licence will apply to this Work are set out in our licence referred to above.

Other than as permitted in any relevant BMJ Author's Self Archiving Policies, I confirm this Work has not been accepted for publication elsewhere, is not being considered for publication elsewhere and does not duplicate material already published. I confirm all authors consent to publication of this Work and authorise the granting of this licence.

**TITLE:** MSF Paediatric days: A step forward in operationalising 'Humanitarian Paediatrics'

**CORRESPONDING AUTHOR:** Sophie Janet, Médecins Sans Frontières Dakar Unit, Yoff  
Toundounp Rya Villa N° 127, Dakar / Sénégal. Email: Sophie.janet@barcelona.msf.org

**CO-AUTHORS:**

Neal Russell, medical department, Médecins Sans Frontières, Amsterdam, Netherlands  
Nikola Morton, medical department, Médecins Sans Frontières, Sydney, Australia  
Daniel Martinez, medical department, Médecins Sans Frontières, Geneva, Switzerland  
Mona Tamannai, medical department, Médecins Sans Frontières, Barcelona, Spain  
Nadia Lafferty, medical department, Médecins Sans Frontières, Barcelona, Spain  
Harriet Roggeveen, medical department, Médecins Sans Frontières, Amsterdam, Netherlands  
Oluwakemi F. Ogundipe, medical department, Médecins Sans Frontières, Brussels, Belgium  
Inmaculada Carreras, medical department, Médecins Sans Frontières, Sydney, Australia  
Anja Gao, medical department, Médecins Sans Frontières, Sydney, Australia  
Elise Didier, medical department, Médecins Sans Frontières, Brussels, Belgium  
Roberta Petrucci, medical department, Médecins Sans Frontières, Geneva, Switzerland

**KEYWORDS:** Humanitarian paediatrics, Essential Newborn Care, community care, paediatric tuberculosis, antimicrobial resistance

**WORD COUNT:** 2021 words

**REFERENCE COUNT:** 17 references

**KEY MESSAGES:**

- One in four children worldwide are living in a humanitarian or fragile setting.
- There is a distinct lack of medical literature from humanitarian settings to provide guidance on best practice in such specific and resource-limited contexts.
- MSF Paediatric Days were born to address paediatric issues of direct humanitarian concern.
- This event unites frontline staff, policy makers and academia to exchange ideas, align efforts, inspire, and share frontline research and experiences.
- Essential newborn care, community-based models of care, paediatric tuberculosis, antimicrobial resistance and collateral damage of COVID-19 on child health were discussed at the 2021 event.
- MSF Paediatric Days is as a unique forum to advance knowledge on humanitarian paediatrics and creates opportunities for individual and collective learning.

**STATEMENTS:**

- ❖ **Funding:** This research received no specific grant from any funding agency in the public, commercial or not-for-profit sectors.
- ❖ **Competing Interests Statement:** The authors declare no conflicts of interests.

❖ **Contributorship Statement:**

- Sophie Janet: substantial contributions to the conception, drafting of manuscript, revision, final approval and submission.
- Neal Russell: substantial contributions to the conception, revision and final approval.
- Nikola Morton: substantial contributions to the conception, revision and final approval.
- Daniel Martinez: substantial contributions to the conception, revision and final approval
- Mona Tamannai: substantial contributions to the conception, revision and final approval
- Nadia Lafferty: substantial contributions to the conception, revision and final approval
- Harriet Roggeveen: substantial contributions to the conception and final approval
- Oluwakemi F. Ogundipe: substantial contributions to the conception, revision and final approval
- Inmaculada Carreras: substantial contributions to the conception and final approval
- Anja Gao: substantial contributions to the conception and final approval
- Elise Didier: substantial contributions to the conception, revision and final approval
- Roberta Petrucci: substantial contributions to the conception, revision and final approval

1  
2  
3 Around the world, one in four children is living in a country affected by conflict, political  
4 insecurity and disaster, and an unprecedented 30-34 million children are displaced from home  
5 (1). Children are disproportionately impacted by crises and face the threat of violence, hunger,  
6 disease, disability, and death. Worldwide, 56 million children under the age of five (half of them  
7 newborns) are projected to die between 2018 and 2030 in the absence of additional action, with  
8 the greatest proportion of this mortality anticipated in humanitarian and fragile settings(2).  
9 Tragically, with a historic reversal of progress expected due to the collateral impact of the SARS-  
10 CoV-2 pandemic, a rising gap between humanitarian needs and funding(3) and declining support  
11 for child health in many cases, the number of children dying is expected to increase even  
12 further(4). In addition to increased mortality, we can expect escalating suffering, lost future  
13 potential, and increasing inequality(5–7).

14  
15  
16  
17  
18 Médecins Sans Frontières (Doctors Without Borders/MSF) is an international medical  
19 humanitarian organisation specialising in responding to humanitarian emergencies such as  
20 conflicts, natural disasters, and epidemics, acting with independence, neutrality, and  
21 impartiality. MSF provides essential medical care to millions of children every year who would  
22 otherwise be without access to healthcare (Table 1) (8).  
23  
24

25 **Table 1 MSF paediatric activities involving children under five years old in 2019 (8)**

| Description                                                        | Number                     |
|--------------------------------------------------------------------|----------------------------|
|                                                                    | (rounded to closest whole) |
| Projects providing paediatric care                                 | 270                        |
| Children receiving outpatient care                                 | 3.3 million                |
| Children receiving inpatient care unrelated to severe malnutrition | 361,000                    |
| Children admitted to therapeutic feeding centres                   | 186,000                    |
| Births supported                                                   | 300,000                    |

26  
27  
28  
29  
30  
31  
32  
33  
34  
35  
36  
37  
38  
39  
40  
41  
42  
43  
44  
45  
46  
47  
48  
49  
50  
51  
52  
53  
54  
55  
56  
57  
58  
59  
60

Healthcare in humanitarian and fragile contexts is challenging and complex to provide, particularly for children. Healthcare staff are scarce, under-resourced and work well over capacity, in some of the most insecure and adverse settings. Yet they continue to provide essential and lifesaving services to vulnerable populations, rarely receiving the recognition they deserve. In addition, there is a distinct lack of medical literature from humanitarian settings to provide guidance on best practices in such specific and resource-limited contexts. There is a need not only to further integrate evidence-based practices into humanitarian contexts, but also to generate evidence on what works best. We need to shine a brighter light on the experiences, challenges, failures, and successes of those working in 'humanitarian paediatrics\*' in order to improve care for this growing population of children in the most vulnerable circumstances.

\* Humanitarian paediatrics refers to the branch of medicine that involves the care of newborns, infants, children, and adolescents in humanitarian settings. It takes elements from public and global health, paediatrics, tropical and disaster medicine. It is centred on the child and his family and integrates the specific challenges and barriers related to the humanitarian context and limited resources.

1  
2  
3 There are not many platforms or venues available to bridge the existing gaps in clinical research  
4 and medical literature applicable to paediatric and neonatal care in humanitarian and fragile  
5 settings. Therefore, in 2016, the first *MSF Paediatric Days* were born with the aim of addressing  
6 urgent paediatric issues of direct humanitarian concern. Since then, three more editions have  
7 taken place at 18-month intervals, successfully uniting frontline staff working in MSF and other  
8 organisations with policymakers and academia to exchange ideas, align efforts, inspire, and  
9 share pertinent research and experiences. This event not only aims to raise awareness and  
10 exchange experiences, but also to impact daily paediatric medical activities in humanitarian  
11 settings by promoting multidisciplinary collaboration, disseminating relevant best practices and  
12 generating specific recommendations (Figure 1).  
13  
14  
15

16  
17 **Figure 1. The MSF Paediatric Days approach to improving paediatric care in humanitarian**  
18 **settings**  
19

20  
21 In April 2021, the first virtual edition of the *MSF Paediatric Days* brought together 1108 people  
22 from 95 different countries. MSF staff made up 58% of the attendees, largely frontline health  
23 workers, and the remainder came from a range of different organisations including academia,  
24 non-governmental organisations, ministries of health and other actors. The event included five  
25 main plenary discussions around key topics on humanitarian paediatrics, and eight virtual stands  
26 from internal MSF initiatives ([MSF eCARE](#): electronic Decision Support System (eDSS) for  
27 paediatric primary care, [Telemedicine: online tool for MSF medical frontline staff that provides  
28 access to specialised medical advice](#), [POCUS: point-of-care ultrasound](#)) and external MSF  
29 collaborating partners (OPENPediatrics, Save the Children, WHO, Laerdal & the American  
30 Academy of Paediatrics, Action Against Hunger, ALIMA and the Société Sénégalaise de Pédiatrie)  
31 who shared content and interacted with the participants. Additionally, 49 posters (available on  
32 [ResearchGate](#)) and 21 video-abstracts were displayed, offering evidence directly from hospitals  
33 and medical projects in fragile and humanitarian settings. This event provided a unique  
34 opportunity for frontline health staff working in such settings to share their experiences,  
35 challenges and solutions, in addition to creating networking spaces for interaction and exchange  
36 of ideas. Moreover, five inspiring short "[PAEDTalks](#)" enriched the content of the event.  
37  
38  
39  
40  
41

42 During this two-day event on April 15-16, five major themes were discussed: essential newborn  
43 care, community-based models of care, paediatric tuberculosis, antimicrobial resistance in  
44 neonatal and paediatric care, and the collateral damage of the SARS-CoV-2 pandemic on child  
45 health. Replays and full event content can be found on the [MSF Paediatric Days webpage](#). The  
46 detailed key messages of the five sessions can be found on the supplement table.  
47  
48  
49

50 Newborns are one of the most vulnerable groups in humanitarian and fragile settings, but they  
51 have received limited focus in humanitarian action(9). The first session entitled "Neonates - back  
52 to basics" illustrated the challenges that field teams face to implement, maintain, support and  
53 promote essential newborn care, with a focus on breastfeeding. Breastfeeding has well  
54 recognised health benefits for mothers and newborns, but is even more crucial in humanitarian  
55 settings where breast milk substitutes are particularly dangerous in the absence of adequate  
56 water, sanitation & hygiene(10,11). Nevertheless, the lifesaving nature of breastfeeding has  
57 often been overlooked in humanitarian settings, with a lack of institutionalised guidance on  
58 supporting breastfeeding(12). The session identified numerous barriers to successful  
59  
60



breastfeeding, such as false assumptions of breastfeeding being easy without need for support, contradictory messaging, and failure to maintain mothers and babies together (mother-baby dyad care) due to lack of adequate space, resources and staff knowledge and awareness. Moreover, gender inequity and female disempowerment, which are exacerbated in crises, also negatively influence breastfeeding practices in many of the contexts where MSF intervenes.

There was a common recognition of the need for breastfeeding promotion and awareness raising among health staff, mothers and communities, including the need for professionals with expertise in breastfeeding promotion to support humanitarian responses. Ultimately, breastfeeding support needs to be recognised as an emergency humanitarian intervention. Different solutions and ideas were shared during the panel discussion to overcome some of these current challenges and to achieve this important shift in paradigm. Improving knowledge and skills on breastfeeding for healthcare providers is crucial, and support from lactation specialist should be made available via innovative platforms such as telemedicine<sup>†</sup>. Engagement of all members of the community including traditional birth attendants, family (including male members) and any other key member of the community should be included in the community engagement strategy of the project.

The second session of the first day entitled **“Community-based models of care for neonatal and child health”** provided insight on the current challenges and achievements of the decentralisation of care, and the important role that the community plays in the continuum of care. During the session, discussions highlighted the opportunity and importance of expanding community models of care, for both children and newborns. Community health workers are crucial for delivering a range of preventive and curative health services, and for reducing inequities in access to care. It was highlighted that community activities should be built upon existing capacity, to avoid the implementation of parallel systems.

The integration of community-based models of care in emergency response is possible and most effective if the model is implemented in advance with standardised emergency preparedness strategies according to context, to promote resilience. Field testimonies from an Integrated Community Case Management program in Niger and community-based nutrition programs among others reinforced the importance, and the potential, that community models of care have in improving access and the continuum of care in children.

On the second day, three main topics were discussed. The first session, **“Paediatric tuberculosis”**, touched upon the challenges of diagnosing tuberculosis (TB), the specificities of paediatric TB, and the role of contact tracing and preventive treatment.

TB is a major infectious killer in MSF settings and children, especially those under five years of age, are at particular risk of severe forms of the disease. Paediatric TB is a “silent disease” frequently under-diagnosed, under-treated and under-reported. TB presents differently in children than in adults, with a higher proportion of extra-pulmonary TB. Microbiological

---

<sup>†</sup> Telemedicine is an MSF service that allows remote medical teams to consult with a whole network of specialist whenever confronted with complex cases.

1  
2  
3 confirmation is rarely achievable in children and is especially challenging in humanitarian  
4 settings. Therefore, emphasis on clinical diagnosis is imperative to ensure that presumptive  
5 treatment is started without delay. Treatment of paediatric TB based on clinical diagnosis alone  
6 would decrease TB morbidity in children thereby minimising preventable deaths from the  
7 disease.  
8  
9

10 Contact tracing of tuberculosis cases in the community and subsequent Tuberculosis Preventive  
11 Treatment (TPT) is often overlooked and deprioritised in low resource settings, but this should  
12 be pursued more actively. This can now be facilitated with new, shorter TPT regimens, which  
13 have already shown promising results in terms of acceptance, efficacy, safety and adherence to  
14 treatment within MSF settings.  
15  
16

17 The second topic discussed on April 16<sup>th</sup> was **“Antimicrobial resistance and antimicrobial**  
18 **stewardship in neonatal and paediatric care”**. Antimicrobial resistance is a reality in  
19 humanitarian settings(13)-(14) and has been described as a silent tsunami. Vulnerable groups  
20 such as newborns and malnourished children face a disproportionate burden and specific  
21 challenges. The challenges and consequences of outbreaks in neonatal units in low resource  
22 settings was highlighted, including both experience within MSF and growing evidence based in  
23 low resource settings outside MSF(15)-(16). In addition, MSF field experiences from Mali and  
24 South Sudan underlined the need for a multidisciplinary approach focusing on several  
25 transversal pillars including Infection Prevention and Control (IPC), antibiotic stewardship and  
26 microbiology (when possible or available). Antibiotic stewardship is particularly challenging for  
27 paediatric patients in humanitarian settings. The combination of high mortality and a lack of  
28 microbiology testing meansthat severe illness is often treated with diagnostic uncertainty,  
29 leading to an overuse of antibiotics. The challenge of access to microbiology was discussed,  
30 including the important role that understanding of local antimicrobial resistance patterns plays  
31 in stewardship practices. While extensive data on antimicrobial resistance exists in some  
32 settings, there is a complete lack of data in many parts of the world. But even without access to  
33 microbiology, there is capacity to improve antibiotic stewardship and IPC, which are essential  
34 and feasible in all settings(17). The importance of an interdisciplinary approach was discussed,  
35 ensuring involvement of all members of the team, including doctors, nurses, pharmacists and  
36 cleaners. Practical tools to support field teams to assess and monitor medical activities from an  
37 antimicrobial resistance lens are available within and outside MSF, such as Point Prevalence  
38 Surveys on antibiotic use, antibiotic consumption analysis and the Stepwise IPC Approach.  
39  
40  
41  
42  
43  
44  
45  
46

47 The last session of the event was dedicated to the **“Collateral damage of COVID-19 on child**  
48 **health”**. Children have been disproportionately affected by the pandemic, with low mortality due  
49 to COVID-19 itself, but high morbidity and mortality due to the multiple collateral effects of the  
50 health crisis. The pandemic has impacted child health through increases in poverty, loss of  
51 education, food insecurity and violence, as well as greater strains on health systems and a  
52 reduction in access to health services. Preventive services like vaccination and nutrition  
53 programmes have been mostly suspended or delayed(18). The indirect effects of the pandemic  
54 have been most severe in resource-limited settings where increased child mortality is a major  
55 concern, widening the gap of inequity for children. There were field testimonies from frontline  
56 health workers outlining the struggle they faced during this unprecedented time. Supporting  
57 health systems to maintain preventive and curative services are crucial to attenuate the ongoing  
58  
59  
60

1  
2  
3 impact. Flexibility to adjust health activities is key to face the challenges brought by the SARS-  
4 CoV-2 pandemic. Boosting community healthcare activities within MSF strategies, as an  
5 essential part of the continuum of care, is an efficient way of assuring healthcare access. Despite  
6 the collateral damage already caused, this past year can also be an opportunity to change our  
7 ways of thinking, activities, support models and future preparedness and responses. More than  
8 ever, now is a crucial time to invest in humanitarian paediatrics, to support children and uphold  
9 their rights in the most fragile contexts.  
10  
11

12  
13 As the world continues to battle the SARS-CoV-2 pandemic, focus and funding for child health in  
14 humanitarian settings suffers while children's needs escalate. The future for children in  
15 humanitarian settings hangs in the balance, and platforms that raise the profile of humanitarian  
16 paediatrics are vital to ensure that these children are not overlooked and remain a priority  
17 among funders, decision-makers and stakeholders. The MSF Paediatric Days serve as a unique  
18 forum to advance knowledge on humanitarian paediatrics, and to create opportunities for  
19 individual and collective learning on this topic. We look forward to the next edition and welcome  
20 all suggestions for the next topics of the [MSF Paediatric Days](#).  
21  
22  
23  
24  
25

## 26 References

- 27  
28 1. United Nations Office for the Coordination of Humanitarian Affairs. Global  
29 Humanitarian Overview 2019 [Internet]. 2019. Available from:  
30 <https://reliefweb.int/sites/reliefweb.int/files/resources/GHO2019.pdf>  
31
- 32 2. UNICEF. Levels and trends in Child Mortality Report 2018. 2018.  
33
- 34 3. A.Spencer BW-K&. Reducing the Humanitarian financing gap: Review of progress since  
35 the report of the High-Level Panel on Humanitarian Financing. 2021.  
36
- 37 4. Robertson T, Carter ED, Chou VB, Stegmuller AR, Jackson BD, Tam Y, et al. Early  
38 estimates of the indirect effects of the COVID-19 pandemic on maternal and child  
39 mortality in low-income and middle-income countries: a modelling study. *Lancet Glob*  
40 *Heal*. 2020 May;0(0).  
41
- 42 5. Wagner Z, Heft-Neal S, Bhutta ZA, Black RE, Burke M, Bendavid E. Armed conflict and  
43 child mortality in Africa: a geospatial analysis. *Lancet* [Internet]. 2018;392(10150):857–  
44 65. Available from: [http://dx.doi.org/10.1016/S0140-6736\(18\)31437-5](http://dx.doi.org/10.1016/S0140-6736(18)31437-5)  
45
- 46 6. Shenoda S, Kadir A, Pitterman S, Goldhagen J. The effects of armed conflict on children.  
47 *Pediatrics*. 2018;142(6).  
48
- 49 7. Pfefferbaum B, Jacobs AK, Van Horn RL, Houston JB. Effects of Displacement in Children  
50 Exposed to Disasters. *Curr Psychiatry Rep*. 2016;18(8):1–5.  
51
- 52 8. MSF Paediatric Working Group. Paediatric activities *Medecins Sans Frontieres*. 2019.  
53
- 54 9. UNICEF, Save the Children WHO. Roadmap to Accelerate Progress for Every Newborn in  
55 Humanitarian Settings 2020 – 2025. 2020.  
56
- 57 10. Jakobsen M, Sodemann M, Nylén G, Balé C, Nielsen J, Lisse I, et al. Breastfeeding status  
58 as a predictor of mortality among refugee children in an emergency situation in Guinea-  
59  
60

- 1  
2  
3 Bissau. *Trop Med Int Heal*. 2003;8(11):992–6.  
4
- 5 11. Hipgrave DB, Assefa F, Winoto A, Sukotjo S. Donated breast milk substitutes and  
6 incidence of diarrhoea among infants and young children after the May 2006  
7 earthquake in Yogyakarta and Central Java. *Public Health Nutr*. 03/23. 2011;15(2):307–  
8 15.  
9
- 10 12. Shaker-Berbari L, Ghattas H, Symon AG, Anderson AS. Infant and young child feeding in  
11 emergencies: Organisational policies and activities during the refugee crisis in Lebanon.  
12 *Matern Child Nutr*. 2018 Jul;14(3):e12576.  
13
- 14 13. Kanapathipillai R, Malou N, Hopman J, Bowman C, Yousef N, Michel J, et al. Antibiotic  
15 resistance in conflict settings: lessons learned in the Middle East. *JAC-Antimicrobial*  
16 *Resist*. 2019;1(1):2–4.  
17
- 18 14. Langendorf C, Le Hello S, Moumouni A, Gouali M, Mamaty AA, Grais RF, et al. Enteric  
19 bacterial pathogens in children with diarrhea in niger: Diversity and antimicrobial  
20 resistance. *PLoS One*. 2015;10(3):1–18.  
21
- 22 15. Okomo U, Senghore M, Darboe S, Bojang E, Zaman SMA, Hossain MJ, et al. Investigation  
23 of sequential outbreaks of *Burkholderia cepacia* and multidrug-resistant extended  
24 spectrum  $\beta$ -lactamase producing *Klebsiella* species in a West African tertiary hospital  
25 neonatal unit: a retrospective genomic analysis. *The Lancet Microbe* [Internet].  
26 2020;1(3):e119–29. Available from: [http://dx.doi.org/10.1016/S2666-5247\(20\)30061-6](http://dx.doi.org/10.1016/S2666-5247(20)30061-6)  
27  
28
- 29 16. Lenglet A, Faniyan O, Hopman J. A Nosocomial Outbreak of Clinical Sepsis in a Neonatal  
30 Care Unit (NCU) in Port-Au-Prince Haiti, July 2014 – September 2015. *PLoS Curr*.  
31 2018;(July 2014).  
32
- 33 17. Johnson J, Akinboyo IC, Curless MS, Milstone AM, Coffin SE, Steeb DR. Saving neonatal  
34 lives by improving infection prevention in low-resource units: Tools are needed. *J Glob*  
35 *Health*. 2019;9(1):9–11.  
36
- 37 18. Sidhu S. WHO and UNICEF warn of a decline in vaccinations during COVID-19. World  
38 Health Organization. 2020;  
39  
40  
41  
42  
43  
44  
45  
46  
47  
48  
49  
50  
51  
52  
53  
54  
55  
56  
57  
58  
59  
60

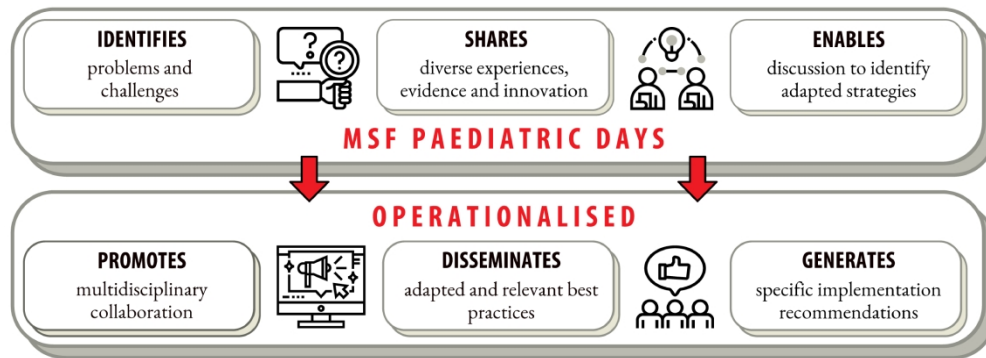

# BMJ Paediatrics Open

## MSF Paediatric days: A step forward in operationalising 'Humanitarian Paediatrics'

|                               |                                                                                                                                                                                                                                                                                                                                                                                                                                                                                                                                                            |
|-------------------------------|------------------------------------------------------------------------------------------------------------------------------------------------------------------------------------------------------------------------------------------------------------------------------------------------------------------------------------------------------------------------------------------------------------------------------------------------------------------------------------------------------------------------------------------------------------|
| Journal:                      | <i>BMJ Paediatrics Open</i>                                                                                                                                                                                                                                                                                                                                                                                                                                                                                                                                |
| Manuscript ID                 | bmjpo-2021-001156.R2                                                                                                                                                                                                                                                                                                                                                                                                                                                                                                                                       |
| Article Type:                 | Review                                                                                                                                                                                                                                                                                                                                                                                                                                                                                                                                                     |
| Date Submitted by the Author: | 29-Aug-2021                                                                                                                                                                                                                                                                                                                                                                                                                                                                                                                                                |
| Complete List of Authors:     | Janet, Sophie ; Medecins Sans Frontieres<br>Russell, Neal; Medecins Sans Frontieres<br>Morton, Nikola; Medecins Sans Frontieres<br>Martinez, Daniel; Medecins Sans Frontieres<br>Tamannai, Mona; Medecins Sans Frontieres<br>Lafferty, Nadia; Medecins Sans Frontieres<br>roggeveen, harriet; Medecins Sans Frontieres<br>Ogundipe, Oluwakemi; Medecins Sans Frontieres<br>Carreras, Inmaculada; Medecins Sans Frontieres<br>Gao, Anja; Medecins Sans Frontieres<br>Didier, Elise; Medecins Sans Frontieres<br>Petrucci, Roberta; Medecins Sans Frontieres |
| Keywords:                     | Neonatology                                                                                                                                                                                                                                                                                                                                                                                                                                                                                                                                                |
|                               |                                                                                                                                                                                                                                                                                                                                                                                                                                                                                                                                                            |

SCHOLARONE™  
Manuscripts



I, the Submitting Author has the right to grant and does grant on behalf of all authors of the Work (as defined in the below author licence), an exclusive licence and/or a non-exclusive licence for contributions from authors who are: i) UK Crown employees; ii) where BMJ has agreed a CC-BY licence shall apply, and/or iii) in accordance with the terms applicable for US Federal Government officers or employees acting as part of their official duties; on a worldwide, perpetual, irrevocable, royalty-free basis to BMJ Publishing Group Ltd ("BMJ") its licensees and where the relevant Journal is co-owned by BMJ to the co-owners of the Journal, to publish the Work in this journal and any other BMJ products and to exploit all rights, as set out in our [licence](#).

The Submitting Author accepts and understands that any supply made under these terms is made by BMJ to the Submitting Author unless you are acting as an employee on behalf of your employer or a postgraduate student of an affiliated institution which is paying any applicable article publishing charge ("APC") for Open Access articles. Where the Submitting Author wishes to make the Work available on an Open Access basis (and intends to pay the relevant APC), the terms of reuse of such Open Access shall be governed by a Creative Commons licence – details of these licences and which [Creative Commons](#) licence will apply to this Work are set out in our licence referred to above.

Other than as permitted in any relevant BMJ Author's Self Archiving Policies, I confirm this Work has not been accepted for publication elsewhere, is not being considered for publication elsewhere and does not duplicate material already published. I confirm all authors consent to publication of this Work and authorise the granting of this licence.

**TITLE:** MSF Paediatric days: A step forward in operationalising 'Humanitarian Paediatrics'

**CORRESPONDING AUTHOR:** Sophie Janet, Médecins Sans Frontières Dakar Unit, Yoff  
Toundounp Rya Villa N° 127, Dakar / Sénégal. Email: Sophie.janet@barcelona.msf.org

**CO-AUTHORS:**

Neal Russell, medical department, Médecins Sans Frontières, Amsterdam, Netherlands  
Nikola Morton, medical department, Médecins Sans Frontières, Sydney, Australia  
Daniel Martinez, medical department, Médecins Sans Frontières, Geneva, Switzerland  
Mona Tamannai, medical department, Médecins Sans Frontières, Barcelona, Spain  
Nadia Lafferty, medical department, Médecins Sans Frontières, Barcelona, Spain  
Harriet Roggeveen, medical department, Médecins Sans Frontières, Amsterdam, Netherlands  
Oluwakemi F. Ogundipe, medical department, Médecins Sans Frontières, Brussels, Belgium  
Inmaculada Carreras, medical department, Médecins Sans Frontières, Sydney, Australia  
Anja Gao, medical department, Médecins Sans Frontières, Sydney, Australia  
Elise Didier, medical department, Médecins Sans Frontières, Brussels, Belgium  
Roberta Petrucci, medical department, Médecins Sans Frontières, Geneva, Switzerland

**KEYWORDS:** Humanitarian paediatrics, Essential Newborn Care, community care, paediatric tuberculosis, antimicrobial resistance

**WORD COUNT:** 2021 words

**REFERENCE COUNT:** 17 references

**KEY MESSAGES:**

- One in four children worldwide are living in a humanitarian or fragile setting.
- There is a distinct lack of medical literature from humanitarian settings to provide guidance on best practice in such specific and resource-limited contexts.
- MSF Paediatric Days were born to address paediatric issues of direct humanitarian concern.
- This event unites frontline staff, policy makers and academia to exchange ideas, align efforts, inspire, and share frontline research and experiences.
- Essential newborn care, community-based models of care, paediatric tuberculosis, antimicrobial resistance and collateral damage of COVID-19 on child health were discussed at the 2021 event.
- MSF Paediatric Days is as a unique forum to advance knowledge on humanitarian paediatrics and creates opportunities for individual and collective learning.

**STATEMENTS:**

- ❖ **Funding:** This research received no specific grant from any funding agency in the public, commercial or not-for-profit sectors.
- ❖ **Competing Interests Statement:** The authors declare no conflicts of interests.



❖ **Contributorship Statement:**

- Sophie Janet: substantial contributions to the conception, drafting of manuscript, revision, final approval and submission.
- Neal Russell: substantial contributions to the conception, revision and final approval.
- Nikola Morton: substantial contributions to the conception, revision and final approval.
- Daniel Martinez: substantial contributions to the conception, revision and final approval
- Mona Tamannai: substantial contributions to the conception, revision and final approval
- Nadia Lafferty: substantial contributions to the conception, revision and final approval
- Harriet Roggeveen: substantial contributions to the conception and final approval
- Oluwakemi F. Ogundipe: substantial contributions to the conception, revision and final approval
- Inmaculada Carreras: substantial contributions to the conception and final approval
- Anja Gao: substantial contributions to the conception and final approval
- Elise Didier: substantial contributions to the conception, revision and final approval
- Roberta Petrucci: substantial contributions to the conception, revision and final approval

1  
2  
3 Around the world, one in four children is living in a country affected by conflict, political  
4 insecurity and disaster, and an unprecedented 30-34 million children are displaced from home  
5 (1). Children are disproportionately impacted by crises and face the threat of violence, hunger,  
6 disease, disability, and death. Worldwide, 56 million children under the age of five (half of them  
7 newborns) are projected to die between 2018 and 2030 in the absence of additional action, with  
8 the greatest proportion of this mortality anticipated in humanitarian and fragile settings(2).  
9 Tragically, with a historic reversal of progress expected due to the collateral impact of the SARS-  
10 CoV-2 pandemic, a rising gap between humanitarian needs and funding(3) and declining support  
11 for child health in many cases, the number of children dying is expected to increase even  
12 further(4). In addition to increased mortality, we can expect escalating suffering, lost future  
13 potential, and increasing inequality(5–7).

14  
15  
16  
17  
18 Médecins Sans Frontières (Doctors Without Borders/MSF) is an international medical  
19 humanitarian organisation specialising in responding to humanitarian emergencies such as  
20 conflicts, natural disasters, and epidemics, acting with independence, neutrality, and  
21 impartiality. MSF provides essential medical care to millions of children every year who would  
22 otherwise be without access to healthcare (see table 1 below). (8)

23  
24  
25 **Table 1 MSF paediatric activities involving children under five years old in 2019(8)**

| Description                                                        | Number                     |
|--------------------------------------------------------------------|----------------------------|
|                                                                    | (rounded to closest whole) |
| Projects providing paediatric care                                 | 270                        |
| Children receiving outpatient care                                 | 3.3 million                |
| Children receiving inpatient care unrelated to severe malnutrition | 361,000                    |
| Children admitted to therapeutic feeding centres                   | 186,000                    |
| Births supported                                                   | 300,000                    |

26  
27  
28  
29  
30  
31  
32  
33  
34  
35  
36  
37  
38  
39  
40  
41  
42  
43  
44  
45  
46  
47  
48  
49  
50  
51  
52  
53  
54  
55  
56  
57  
58  
59  
60  
Healthcare in humanitarian and fragile contexts is challenging and complex to provide,  
particularly for children. Healthcare staff are scarce, under-resourced and work well over  
capacity, in some of the most insecure and adverse settings. Yet they continue to provide  
essential and lifesaving services to vulnerable populations, rarely receiving the recognition they  
deserve. In addition, there is a distinct lack of medical literature from humanitarian settings to  
provide guidance on best practices in such specific and resource-limited contexts. There is a  
need not only to further integrate evidence-based practices into humanitarian contexts, but also  
to generate evidence on what works best. We need to shine a brighter light on the experiences,  
challenges, failures, and successes of those working in “humanitarian paediatrics”(box 1) in order  
to improve care for this growing population of children in the most vulnerable circumstances.

**Box 1. Humanitarian paediatrics** refers to the branch of medicine that involves the care of  
newborns, infants, children, and adolescents in humanitarian settings. It takes elements from  
public and global health, paediatrics, tropical and disaster medicine. It is centred on the child

1  
2  
3 and his family and integrates the specific challenges and barriers related to the humanitarian  
4 context and limited resources.  
5

6  
7 There are not many platforms or venues available to bridge the existing gaps in clinical research  
8 and medical literature applicable to paediatric and neonatal care in humanitarian and fragile  
9 settings. Therefore, in 2016, the first *MSF Paediatric Days* were born with the aim of addressing  
10 urgent paediatric issues of direct humanitarian concern. Since then, three more editions have  
11 taken place at 18-month intervals, successfully uniting frontline staff working in MSF and other  
12 organisations with policymakers and academia to exchange ideas, align efforts, inspire, and  
13 share pertinent research and experiences. This event not only aims to raise awareness and  
14 exchange experiences, but also to impact daily paediatric medical activities in humanitarian  
15 settings by promoting multidisciplinary collaboration, disseminating relevant best practices and  
16 generating specific recommendations (Figure 1).  
17  
18  
19

20 **Figure 1. The MSF Paediatric Days approach to improving paediatric care in humanitarian settings**

21  
22  
23 In April 2021, the first virtual edition of the *MSF Paediatric Days* brought together 1108 people  
24 from 95 different countries. MSF staff made up 58% of the attendees, largely frontline health  
25 workers, and the remainder came from a range of different organisations including academia,  
26 non-governmental organisations, ministries of health and other actors. The event included five  
27 main plenary discussions around key topics on humanitarian paediatrics, and eight virtual stands  
28 from internal MSF initiatives ([MSF eCARE](#): electronic Decision Support System (eDSS) for  
29 paediatric primary care, [Telemedicine: online tool for MSF medical frontline staff that provides  
30 access to specialised medical advice](#), [POCUS: point-of-care ultrasound](#)) and external MSF  
31 collaborating partners (OPENPediatrics, Save the Children, WHO, Laerdal & the American  
32 Academy of Paediatrics, Action Against Hunger, ALIMA and the Société Sénégalaise de Pédiatrie)  
33 who shared content and interacted with the participants. Additionally, 49 posters (available on  
34 [ResearchGate](#)) and 21 video-abstracts were displayed, offering evidence directly from hospitals  
35 and medical projects in fragile and humanitarian settings. This event provided a unique  
36 opportunity for frontline health staff working in such settings to share their experiences,  
37 challenges and solutions, in addition to creating networking spaces for interaction and exchange  
38 of ideas. Moreover, five inspiring short "[PAEDTalks](#)" enriched the content of the event.  
39  
40  
41  
42  
43  
44

45 During this two-day event on April 15-16, five major themes were discussed: essential newborn  
46 care, community-based models of care, paediatric tuberculosis, antimicrobial resistance in  
47 neonatal and paediatric care, and the collateral damage of the SARS-CoV-2 pandemic on child  
48 health. Replays and full event content can be found on the [MSF Paediatric Days webpage](#).  
49  
50

51 **Newborn care: back to basics**

52  
53 Newborns are one of the most vulnerable groups in humanitarian and fragile settings, but they  
54 have received limited focus in humanitarian action(9). The first session entitled "Neonates -  
55 back to basics" illustrated the challenges that field teams face to implement, maintain, support  
56 and promote essential newborn care, with a focus on breastfeeding. Breastfeeding has well  
57 recognised health benefits for mothers and newborns, but is even more crucial in humanitarian  
58 settings where breast milk substitutes are particularly dangerous in the absence of adequate  
59  
60

water, sanitation & hygiene(10,11). Nevertheless, the lifesaving nature of breastfeeding has often been overlooked in humanitarian settings, with a lack of institutionalised guidance on supporting breastfeeding(12). The session identified numerous barriers to successful breastfeeding, such as false assumptions of breastfeeding being easy without need for support, contradictory messaging, and failure to maintain mothers and babies together (mother-baby dyad care) due to lack of adequate space, resources and staff knowledge and awareness. Moreover, gender inequity and female disempowerment, which are exacerbated in crises, also negatively influence breastfeeding practices in many of the contexts where MSF intervenes.

There was a common recognition of the need for breastfeeding promotion and awareness raising among health staff, mothers and communities, including the need for professionals with expertise in breastfeeding promotion to support humanitarian responses. Ultimately, breastfeeding support needs to be recognised as an emergency humanitarian intervention. Different solutions and ideas were shared during the panel discussion to overcome some of these current challenges and to achieve this important shift in paradigm. Improving knowledge and skills on breastfeeding for healthcare providers is crucial, and support from lactation specialist should be made available via innovative platforms such as telemedicine. Engagement of all members of the community including traditional birth attendants, family (including male members) and any other key member of the community should be included in the community engagement strategy of the project. Key messages of this session can be found in table 2.

**Table 2. Newborn care: back to basics**

| Key messages                                                                                                                                                                                                                       | Why is it important?                                                                                                                                                                                                                                                                                                                                                                                                                                                                                                                              | Current challenges                                                                                                                                                                                                                                                                                                                                                                                                                                                                                                                                                                                                 | Recommendations                                                                                                                                                                                                                                                                                                                                                                                                                                                                                                                                                                                                                                                                                                                                                                                                                                                                                                                                                                                                                                                                                                                                                                                                                                                 |
|------------------------------------------------------------------------------------------------------------------------------------------------------------------------------------------------------------------------------------|---------------------------------------------------------------------------------------------------------------------------------------------------------------------------------------------------------------------------------------------------------------------------------------------------------------------------------------------------------------------------------------------------------------------------------------------------------------------------------------------------------------------------------------------------|--------------------------------------------------------------------------------------------------------------------------------------------------------------------------------------------------------------------------------------------------------------------------------------------------------------------------------------------------------------------------------------------------------------------------------------------------------------------------------------------------------------------------------------------------------------------------------------------------------------------|-----------------------------------------------------------------------------------------------------------------------------------------------------------------------------------------------------------------------------------------------------------------------------------------------------------------------------------------------------------------------------------------------------------------------------------------------------------------------------------------------------------------------------------------------------------------------------------------------------------------------------------------------------------------------------------------------------------------------------------------------------------------------------------------------------------------------------------------------------------------------------------------------------------------------------------------------------------------------------------------------------------------------------------------------------------------------------------------------------------------------------------------------------------------------------------------------------------------------------------------------------------------|
| Breastfeeding (BF) is an intervention that saves lives, improves health and development of newborns, as well as maternal well-being. BF should be universally and practically achieved with dedicated support in all MSF contexts. | <p>Newborn mortality and morbidities remain high across MSF projects. Essential evidence-based interventions shown to decrease newborn mortality such as exclusive and early breastfeeding should be supported and scaled-up to save lives across MSF.</p> <p>Breastfeeding is natural, instinctive, ready-made and vastly available. However, many women face different challenges to establish and sustain BF. To overcome those challenges a coordinated and multidisciplinary support should be available for every woman and their baby.</p> | <ul style="list-style-type: none"> <li>- BF is believed to be intuitive and easy for women. This is globally recognised as a harmful assumption.</li> <li>- Essential, evidence-based aspects of BF, such as to starting within the first hour of life and exclusive BF for 6 months, are not always considered.</li> <li>- BF is not always recognized as an intervention and therefore there are no allocated resources for breastfeeding support.</li> <li>- Suboptimal training and preparation lead to varying and even contradictory messages given to the mother and family within MSF projects.</li> </ul> | <p><b>Field:</b></p> <ul style="list-style-type: none"> <li>- Consider BF as an intervention to reduce newborn mortality and allocate space, time and resources in planning for it.</li> <li>- Promote BF and essential newborn care champions or focal points</li> <li>- Support and promote early and exclusive breastfeeding, including where it seems not easy for newborn or mother</li> <li>- Promote multidisciplinary (midwife, nutritionist, nurses, doctors, logistician) work to support BF, increase awareness and discuss responsibilities and division of tasks</li> </ul> <p><b>Operations:</b></p> <ul style="list-style-type: none"> <li>- Include essential newborn care interventions (such as BF and KMC) into the main/strategic interventions to decrease neonatal mortality at project level and coordinate resources to support it.</li> <li>- Promote partnership with other actors involved in essential newborn care, especially at local level.</li> </ul> <p><b>HQ:</b></p> <ul style="list-style-type: none"> <li>- Ensure BF policies and guidance are available and harmonised across MSF</li> <li>- Support and encourage access to lactation consultants in telemedicine or other platforms to support field teams</li> </ul> |

|                                                                                                                                                  |                                                                                                                                                                                                                                                             |                                                                                                                                                                                                                                                       |                                                                                                                                                                                                                                                                                                                                                                                                                                                                                                                                                                                                                                                   |
|--------------------------------------------------------------------------------------------------------------------------------------------------|-------------------------------------------------------------------------------------------------------------------------------------------------------------------------------------------------------------------------------------------------------------|-------------------------------------------------------------------------------------------------------------------------------------------------------------------------------------------------------------------------------------------------------|---------------------------------------------------------------------------------------------------------------------------------------------------------------------------------------------------------------------------------------------------------------------------------------------------------------------------------------------------------------------------------------------------------------------------------------------------------------------------------------------------------------------------------------------------------------------------------------------------------------------------------------------------|
|                                                                                                                                                  |                                                                                                                                                                                                                                                             |                                                                                                                                                                                                                                                       | <ul style="list-style-type: none"> <li>- Ensure that training on essential newborn care including breastfeeding are available in different languages for frontline staff.</li> </ul>                                                                                                                                                                                                                                                                                                                                                                                                                                                              |
| <p>A family centred approach, which includes an understanding of the community and the context, is needed to ensure successful breastfeeding</p> | <p>To effectively support mothers, we need to understand the barriers and enablers related to a specific context</p> <p>The mother-baby dyad is at the centre of the process, but all the family and community need to participate, support, encourage.</p> | <ul style="list-style-type: none"> <li>- There is often little understanding about how BF is perceived in different contexts and what are the barriers and enablers in different settings, including the influence of other family members</li> </ul> | <p><b>Field:</b></p> <ul style="list-style-type: none"> <li>- Include families, caretakers, community health workers in understanding the local influences to support the promotion of BF.</li> </ul> <p><b>Operations:</b></p> <ul style="list-style-type: none"> <li>- Essential newborn care (including BF understanding and support) should be factored into community level programmes.</li> </ul> <p><b>Research:</b></p> <ul style="list-style-type: none"> <li>- If BF levels low or poorly understood, consider anthropological studies in different contexts on barriers and enablers for breastfeeding. Include male views.</li> </ul> |

### Community-based models of care

The second session of the first day entitled “**Community-based models of care for neonatal and child health**” provided insight on the current challenges and achievements of the decentralisation of care, and the important role that the community plays in the continuum of care. During the session, discussions highlighted the opportunity and importance of expanding community models of care, for both children and newborns. Community health workers are crucial for delivering a range of preventive and curative health services, and for reducing inequities in access to care. It was highlighted that community activities should be built upon existing capacity, to avoid the implementation of parallel systems.

The integration of community-based models of care in emergency response is possible and most effective if the model is implemented in advance with standardised emergency preparedness strategies according to context, to promote resilience. Field testimonies from an Integrated Community Case Management program in Niger and community-based nutrition programs among others reinforced the importance, and the potential, that community models of care have in improving access and the continuum of care in children. See key messages of this session in table 3.

**Table 3. Community-based models of care in paediatrics**

| Key messages                                                                                                                               | Why is it important?                                                                                                                         | Current challenges                                                                                                                                    | Recommendations                                                                                                                                                                                                                                                |
|--------------------------------------------------------------------------------------------------------------------------------------------|----------------------------------------------------------------------------------------------------------------------------------------------|-------------------------------------------------------------------------------------------------------------------------------------------------------|----------------------------------------------------------------------------------------------------------------------------------------------------------------------------------------------------------------------------------------------------------------|
| <p>Community models of care are effective in delivering a range of preventive, promotive and curative health services for children and</p> | <p>In humanitarian and fragile settings when access to health facilities is limited, care at community level can bridge important health</p> | <ul style="list-style-type: none"> <li>- Community activities suffer from lack of anchorage with the existing health system and tend to be</li> </ul> | <p><b>Field:</b></p> <ul style="list-style-type: none"> <li>- Community models of care should be rooted in understanding of the context, social realities and values of the communities we are working with and designed in a participatory manner.</li> </ul> |

|                                                                                                                                                                            |                                                                                                                                                                                                                                                         |                                                                                                                                                                                                                                                                                                                                                 |                                                                                                                                                                                                                                                                                                                                                                                                                                                                                                                                                                                                                                                                                                                                                                                                                                                                                                                                                                                                                                                                                                            |
|----------------------------------------------------------------------------------------------------------------------------------------------------------------------------|---------------------------------------------------------------------------------------------------------------------------------------------------------------------------------------------------------------------------------------------------------|-------------------------------------------------------------------------------------------------------------------------------------------------------------------------------------------------------------------------------------------------------------------------------------------------------------------------------------------------|------------------------------------------------------------------------------------------------------------------------------------------------------------------------------------------------------------------------------------------------------------------------------------------------------------------------------------------------------------------------------------------------------------------------------------------------------------------------------------------------------------------------------------------------------------------------------------------------------------------------------------------------------------------------------------------------------------------------------------------------------------------------------------------------------------------------------------------------------------------------------------------------------------------------------------------------------------------------------------------------------------------------------------------------------------------------------------------------------------|
| <p>neonates, and they can contribute to reducing inequities in access to care.</p>                                                                                         | <p>gaps for mothers, newborns and children.</p> <p>The community-based activities are an essential part of the health system, contributing to build skills and confidence to empower people with knowledge, tools and understanding referral needs.</p> | <p>implemented as a parallel system</p> <ul style="list-style-type: none"> <li>- Monitoring and evaluation (M&amp;E) of the service delivered are hampered by the lack of clear and simple core indicators</li> <li>- Community health workers are given more and more responsibilities, their skills and workload not always match.</li> </ul> | <ul style="list-style-type: none"> <li>- Simplified core indicators of implementation, quality of care and utilization of services, should be implemented to allow M&amp;E, along with qualitative data to understand important barriers and enablers</li> <li>- Involve communities in M&amp;E of programs, at a minimum through assuring context appropriate feedback mechanisms are in place.</li> <li>- Ensure realistic workload of the Community Health Workers (CHW) and enhance their motivation through social recognition of their work, an appropriate reward system, regular supervision, feedback, exchanges, sense of belonging to a larger network.</li> </ul> <p><b>Operations:</b></p> <ul style="list-style-type: none"> <li>- Community activities should be built upon existing capacity, avoiding the implementation of a parallel system.</li> </ul> <p><b>HQ:</b></p> <ul style="list-style-type: none"> <li>- Provide a framework for assessing / training CHWs and a catalogue of relevant expectations of CHW dependant on achievable and most relevant competencies.</li> </ul> |
| <p>Community models of care in emergency response are most effective if the model is implemented in advance with contextual emergency preparedness (EPREP) strategies.</p> | <p>Empowering the community in delivering health care increases resilience during crises when access to the health facilities maybe further limited.</p>                                                                                                | <ul style="list-style-type: none"> <li>- Planning and preparation are essential to deliver effective emergency response, but there is still little investment in EPREP at community level</li> </ul>                                                                                                                                            | <p><b>Field/operations:</b></p> <ul style="list-style-type: none"> <li>- integrate paediatric and neonatal community activities in the EPREP strategy.</li> </ul> <p><b>HQ:</b></p> <ul style="list-style-type: none"> <li>- Further simplify tools, M&amp;E indicators and a framework for prioritisation for community activities during emergency response</li> </ul>                                                                                                                                                                                                                                                                                                                                                                                                                                                                                                                                                                                                                                                                                                                                   |

**Paediatric Tuberculosis**

On the second day, three main topics were discussed. The first session, “**Paediatric tuberculosis**”, touched upon the challenges of diagnosing tuberculosis (TB), the specificities of paediatric TB, and the role of contact tracing and preventive treatment.

TB is a major infectious killer in MSF settings and children, especially those under five years of age, are at particular risk of severe forms of the disease. Paediatric TB is a “silent disease” frequently under-diagnosed, under-treated and under-reported. TB presents differently in children than in adults, with a higher proportion of extra-pulmonary TB. Microbiological confirmation is rarely achievable in children and is especially challenging in humanitarian settings. Therefore, emphasis on clinical diagnosis is imperative to ensure that presumptive treatment is started without delay. Treatment of paediatric TB based on clinical diagnosis alone would decrease TB morbidity in children thereby minimising preventable deaths from the disease.

Contact tracing of tuberculosis cases in the community and subsequent Tuberculosis Preventive Treatment (TPT) is often overlooked and deprioritised in low resource settings, but this should be pursued more actively. This can now be facilitated with new, shorter TPT regimens, which have already shown promising results in terms of acceptance, efficacy, safety and adherence to treatment within MSF settings. See key messages of the session in table 4.

Table 4. Paediatric Tuberculosis

| Key messages                                                                                                                                                                                                                                         | Why is it important?                                                                                                                                                                                                                                                                                                                                                                                                                                        | Current challenges                                                                                                                                                                                                                                                                                                                                                                                                                                                                                                                                                                                      | Recommendations                                                                                                                                                                                                                                                                                                                                                                                                                                                                                                                                                                                                                                                                                                                                                                                                                                                                                                                                                                                                          |
|------------------------------------------------------------------------------------------------------------------------------------------------------------------------------------------------------------------------------------------------------|-------------------------------------------------------------------------------------------------------------------------------------------------------------------------------------------------------------------------------------------------------------------------------------------------------------------------------------------------------------------------------------------------------------------------------------------------------------|---------------------------------------------------------------------------------------------------------------------------------------------------------------------------------------------------------------------------------------------------------------------------------------------------------------------------------------------------------------------------------------------------------------------------------------------------------------------------------------------------------------------------------------------------------------------------------------------------------|--------------------------------------------------------------------------------------------------------------------------------------------------------------------------------------------------------------------------------------------------------------------------------------------------------------------------------------------------------------------------------------------------------------------------------------------------------------------------------------------------------------------------------------------------------------------------------------------------------------------------------------------------------------------------------------------------------------------------------------------------------------------------------------------------------------------------------------------------------------------------------------------------------------------------------------------------------------------------------------------------------------------------|
| Underdiagnosis and undertreatment of paediatric TB lead to preventable deaths. Microbiological confirmation is rarely available in children, therefore at present, a clinical diagnosis should be used to start presumptive treatment without delay. | <p>TB remains a major, unrecognised killer in children. MSF has a possibility to make a difference now, by increasing the knowledge of field teams who meet children or their caretakers.</p> <p>Presumptive and empiric TB treatment is safe, well tolerated and effective. Starting treatment based on clinical suspicion (not microbiology confirmation) will bridge the gap of underdiagnosis and undertreatment of TB in children in MSF projects.</p> | <ul style="list-style-type: none"> <li>- Paediatric Tuberculosis is a “silent disease” frequently under-diagnosed, under-treated and under-reported</li> <li>- MSF staff are not always familiar with the different clinical presentations of TB in children and there is a gap in capacity building on this topic.</li> <li>- Confirmatory TB diagnosis is often hard to access in and can be difficult in children.</li> <li>- Delays of starting treatment based on a microbiological diagnosis, perpetuate TB under-treatment in children who may die, through these unnecessary delays.</li> </ul> | <p><b>Field:</b></p> <ul style="list-style-type: none"> <li>- Know the local burden of paediatric TB.</li> <li>- Support medical field teams on how to recognise TB in children as part of their daily work.</li> <li>- While caring for adults with TB, consider the children exposed.</li> <li>- Treat TB based on clinical suspicion.</li> </ul> <p><b>Operations:</b></p> <ul style="list-style-type: none"> <li>- Integrate TB activities in paediatric care.</li> <li>- Monitor program data and investigate if under diagnoses is suspected depending on the local prevalence of TB.</li> <li>- Promote capacity building and facilitate access to learning opportunities on paediatric TB including the online free course.</li> </ul> <p><b>HQ/research:</b></p> <ul style="list-style-type: none"> <li>- Advocate for the integration of TB in all paediatric projects.</li> <li>- Provide support and guidance on clinical algorithm for the diagnosis and treatment of TB in paediatric projects.</li> </ul> |
| Tracing the contacts of patients with tuberculosis with the offer of Tuberculosis Preventive Treatment (TPT) should be pursued as an effective strategy to save lives in MSF projects                                                                | <p>Contact tracing of TB patients is an effective way to identify those who have active TB but also those who maybe harbouring latent (sleeping) TB. More lives can be save by improving access to timely treatment or TPT.</p> <p>New shorter drug regimens for TPT are showing promising results on acceptance, effectivity, safety and adherence to treatment.</p>                                                                                       | <ul style="list-style-type: none"> <li>- Contact tracing requires resources, which is often a barrier to its roll out in communities, especially if it is in addition to other community activities.</li> <li>- Standard TPT strategy is currently well established, but shorten regimens that show promising results have not been fully validated for MSF programs</li> </ul>                                                                                                                                                                                                                         | <p><b>Field</b></p> <ul style="list-style-type: none"> <li>- Contact tracing should be performed whenever a TB case is identified.</li> <li>- Assure systematic follow up of children under TPT in the community</li> </ul> <p><b>Operations:</b></p> <ul style="list-style-type: none"> <li>- Innovate and pilot TPT programs in settings where the need is clear and share experiences with the whole MSF movement to improve future efforts.</li> <li>- Seek partnership for TPT with community and other non-governmental organisations to reduce the resource burden and optimize program reach.</li> </ul> <p><b>HQ/Working groups:</b></p> <ul style="list-style-type: none"> <li>- Determine where TPT will be most beneficial to reduce paediatric TB burden and implement and learn from those MSF sites.</li> </ul>                                                                                                                                                                                           |

### Antimicrobial resistance and antimicrobial stewardship in neonatal and paediatric care

The second topic discussed on April 16<sup>th</sup> was “**Antimicrobial resistance and antimicrobial stewardship in neonatal and paediatric care**”. Antimicrobial resistance is a reality in humanitarian settings(13)-(14) and has been described as a silent tsunami. Vulnerable groups such as newborns and malnourished children face a disproportionate burden and specific challenges. The challenges and consequences of outbreaks in neonatal units in low resource settings was highlighted, including both experience within MSF and growing evidence based in low resource settings outside MSF(15)-(16). In addition, MSF field experiences from Mali and South Sudan underlined the need for a multidisciplinary approach focusing on several transversal pillars including Infection Prevention and Control (IPC), antibiotic stewardship and microbiology (when possible or available). Antibiotic stewardship is particularly challenging for paediatric patients in humanitarian settings. The combination of high mortality and a lack of microbiology testing meansthat severe illness is often treated with diagnostic uncertainty, leading to an overuse of antibiotics. The challenge of access to microbiology was discussed, including the important role that understanding of local antimicrobial resistance patterns plays in stewardship practices. While extensive data on antimicrobial resistance exists in some settings, there is a complete lack of data in many parts of the world. But even without access to microbiology, there is capacity to improve antibiotic stewardship and IPC, which are essential and feasible in all settings(17). The importance of an interdisciplinary approach was discussed, ensuring involvement of all members of the team, including doctors, nurses, pharmacists and cleaners. Practical tools to support field teams to assess and monitor medical activities from an antimicrobial resistance lens are available within and outside MSF, such as Point Prevalence Surveys on antibiotic use, antibiotic consumption analysis and the Stepwise IPC Approach. Key messages for this session can be found in table 5

**Table 5. Antimicrobial resistance and antimicrobial stewardship in neonatal and paediatric care**

| Key messages                                                                                                                                                                                                                                                                                                                                                                                                                                                                            | Why is it important?                                                                                                                                                                                                                                                                                                                                                                                                                                                            | Current challenges                                                                                                                                                                                                                                                                                                                                                                                                                               | Recommendations                                                                                                                                                                                                                                                                                                                                                                                                                                                                                                                                                                                                                                                                                                                                                                                                                                                               |
|-----------------------------------------------------------------------------------------------------------------------------------------------------------------------------------------------------------------------------------------------------------------------------------------------------------------------------------------------------------------------------------------------------------------------------------------------------------------------------------------|---------------------------------------------------------------------------------------------------------------------------------------------------------------------------------------------------------------------------------------------------------------------------------------------------------------------------------------------------------------------------------------------------------------------------------------------------------------------------------|--------------------------------------------------------------------------------------------------------------------------------------------------------------------------------------------------------------------------------------------------------------------------------------------------------------------------------------------------------------------------------------------------------------------------------------------------|-------------------------------------------------------------------------------------------------------------------------------------------------------------------------------------------------------------------------------------------------------------------------------------------------------------------------------------------------------------------------------------------------------------------------------------------------------------------------------------------------------------------------------------------------------------------------------------------------------------------------------------------------------------------------------------------------------------------------------------------------------------------------------------------------------------------------------------------------------------------------------|
| <p>Patients, and especially newborns and children are harmed by and even die because of antimicrobial resistance (AMR) in MSF projects. The problem is escalating in front of us like an invisible tsunami, with limited visibility on its burden and consequences.</p> <p>It is critical for MSF to systematically implement the available tools to reduce AMR, especially where microbiology is not available: Infection prevention and control (IPC), and antibiotic stewardship</p> | <p>Antimicrobial resistance (AMR) is a reality in humanitarian settings and newborn and children are particularly exposed.</p> <p>Multidrug resistant bacterial sepsis particularly affects the most fragile patients, as shown by the increase in the reports of outbreaks in neonatal units in low resource settings.</p> <p>IPC and antibiotic stewardship are crucial and effective strategies against AMR, particularly in contexts where microbiology is unavailable.</p> | <ul style="list-style-type: none"> <li>- There is lack of awareness on the Increasing paediatric and neonatal morbidity and mortality because of AMR in humanitarian settings.</li> <li>- There is a false perception that AMR does not affect low-resource settings and limited available data to accurately define the extent of the problem.</li> <li>- Misconception that without microbiology, it is not possible to tackle AMR.</li> </ul> | <p><b>Field:</b></p> <ul style="list-style-type: none"> <li>- Strengthen awareness and training on IPC interventions, and scale up use of IPC quality improvement tools.</li> <li>- Create multidisciplinary AMR project committee including all the relevant health workers (nurses, doctors, pharmacists, IPC focal points, cleaners), and identify focal points and champions</li> <li>- Scale up use of audits of antimicrobial use</li> </ul> <p><b>Operations:</b></p> <ul style="list-style-type: none"> <li>- Integrate AMR and antibiotic stewardship as part of quality improvement initiatives.</li> <li>- Formalise AMR and IPC focal point roles in job descriptions</li> <li>- Increase access to microbiological tools available to the field, including exploring partnerships with national and regional laboratories.</li> </ul> <p><b>Research/HQ:</b></p> |



|  |  |                                                                                                        |                                                                                                                                                                                                                                                                                                                                                                   |
|--|--|--------------------------------------------------------------------------------------------------------|-------------------------------------------------------------------------------------------------------------------------------------------------------------------------------------------------------------------------------------------------------------------------------------------------------------------------------------------------------------------|
|  |  | <ul style="list-style-type: none"> <li>- There are gaps on access to microbiological tools.</li> </ul> | <ul style="list-style-type: none"> <li>- Adapt IPC assessment tools to address specific challenges in neonatal and paediatric care.</li> <li>- Update guidelines in accordance with evidence on AMR in different infection syndromes</li> <li>- Explore alternative metrics/indicators for antibiotic use in children to guide antibiotic stewardship.</li> </ul> |
|--|--|--------------------------------------------------------------------------------------------------------|-------------------------------------------------------------------------------------------------------------------------------------------------------------------------------------------------------------------------------------------------------------------------------------------------------------------------------------------------------------------|

### Collateral damage of COVID-19 on child health

The last session of the event was dedicated to the “**Collateral damage of COVID-19 on child health**”. Children have been disproportionately affected by the pandemic, with low mortality due to COVID-19 itself, but high morbidity and mortality due to the multiple collateral effects of the health crisis. The pandemic has impacted child health through increases in poverty, loss of education, food insecurity and violence, as well as greater strains on health systems and a reduction in access to health services. Preventive services like vaccination and nutrition programmes have been mostly suspended or delayed(18). The indirect effects of the pandemic have been most severe in resource-limited settings where increased child mortality is a major concern, widening the gap of inequity for children. There were field testimonies from frontline health workers outlining the struggle they faced during this unprecedented time. Supporting health systems to maintain preventive and curative services are crucial to attenuate the ongoing impact. Flexibility to adjust health activities is key to face the challenges brought by the SARS-CoV-2 pandemic. Boosting community healthcare activities within MSF strategies, as an essential part of the continuum of care, is an efficient way of assuring healthcare access. Find in table 6 the key messages of this session.

Despite the collateral damage already caused, this past year can also be an opportunity to change our ways of thinking, activities, support models and future preparedness and responses. More than ever, now is an crucial time to invest in humanitarian paediatrics, to support children and uphold their rights in the most fragile contexts.

**Table 6. Collateral damage of COVID-19 on child health**

| Key messages                                                                                                                                                                                                                                                                                                                                                                                             | Why is it important?                                                                                                                                                                                                                                                                                                                             | Current challenges                                                                                                                                                                                                                                                                                                                                                                          | Recommendations                                                                                                                                                                                                                                                                                                                                                                                                                                                                                    |
|----------------------------------------------------------------------------------------------------------------------------------------------------------------------------------------------------------------------------------------------------------------------------------------------------------------------------------------------------------------------------------------------------------|--------------------------------------------------------------------------------------------------------------------------------------------------------------------------------------------------------------------------------------------------------------------------------------------------------------------------------------------------|---------------------------------------------------------------------------------------------------------------------------------------------------------------------------------------------------------------------------------------------------------------------------------------------------------------------------------------------------------------------------------------------|----------------------------------------------------------------------------------------------------------------------------------------------------------------------------------------------------------------------------------------------------------------------------------------------------------------------------------------------------------------------------------------------------------------------------------------------------------------------------------------------------|
| <p>Children have disproportionately been affected by the COVID-19 pandemic, with low direct mortality, but high morbidity and- mortality due to the multiple collateral effects of the health crisis</p> <p>This unprecedented crisis offers an opportunity to change our ways of thinking, deploy and maintain our activities, rethink support models and define future preparedness and responses.</p> | <p>The pandemic has impacted child health through increases in poverty, loss of education, food insecurity, violence as well as increased strain on health systems and reduction in access to health services.</p> <p>These collateral effects of the pandemic have been most striking in resource-limited settings where increases in child</p> | <ul style="list-style-type: none"> <li>- The focus on the direct impact of COVID-19 has had a huge and overlooked negative impact on children through the reduction and suspension of essential health care services.</li> <li>- The risk of weakening essential services continues through resurgence of the pandemic. There is a potential extra burden related to vaccination</li> </ul> | <p><b>Field</b></p> <ul style="list-style-type: none"> <li>- Adapt and innovate to maintain routine services, such as continuum of nutritional screening and vaccination</li> <li>- Witness, document and report collateral effects of the pandemic on children, real time and in retrospect.</li> </ul> <p><b>Operations</b></p> <ul style="list-style-type: none"> <li>- Maintain the preventive and curative paediatric regular services to limit an increase in child morbidity and</li> </ul> |

|                                                                                                                                                                                                                                                                                                |                                                                                                                                                                                          |                                                                                                                                                                                                                                                                                                                                                                                                                                                                                                                                                                                                                                                                                                                                                                                                                          |
|------------------------------------------------------------------------------------------------------------------------------------------------------------------------------------------------------------------------------------------------------------------------------------------------|------------------------------------------------------------------------------------------------------------------------------------------------------------------------------------------|--------------------------------------------------------------------------------------------------------------------------------------------------------------------------------------------------------------------------------------------------------------------------------------------------------------------------------------------------------------------------------------------------------------------------------------------------------------------------------------------------------------------------------------------------------------------------------------------------------------------------------------------------------------------------------------------------------------------------------------------------------------------------------------------------------------------------|
| <p>mortality is a major concern.</p> <p>Preventive services like vaccination and nutrition programmes have been affected most by suspension or delay.</p> <p>The tremendous detrimental effects of the pandemic on child health are still unfolding and our concern as MSF should be high.</p> | <p>programmes in poorly resourced health systems, where healthcare workers and resources will be repurposed to deliver those vaccines at the expense of critical childhood services.</p> | <p>mortality.</p> <ul style="list-style-type: none"> <li>- Boost the community health care activities in MSF strategies, as an essential piece of the continuum of care and as an efficient way of assuring health access.</li> <li>- Be flexible and innovative in order to adjust our health care activities according to the situation and to provide proper technical medical support to the field teams.</li> </ul> <p><b>HQ</b></p> <ul style="list-style-type: none"> <li>- Consider COVID-19 pandemic as a transformative opportunity to develop new approaches and implement new and practical tools needed in the field reality.</li> <li>- Advocate at national and international level for the continuity of routine preventive and curative paediatric and neonatal activities in this pandemic.</li> </ul> |
|------------------------------------------------------------------------------------------------------------------------------------------------------------------------------------------------------------------------------------------------------------------------------------------------|------------------------------------------------------------------------------------------------------------------------------------------------------------------------------------------|--------------------------------------------------------------------------------------------------------------------------------------------------------------------------------------------------------------------------------------------------------------------------------------------------------------------------------------------------------------------------------------------------------------------------------------------------------------------------------------------------------------------------------------------------------------------------------------------------------------------------------------------------------------------------------------------------------------------------------------------------------------------------------------------------------------------------|

**Conclusions**

As the world continues to battle the SARS-CoV-2 pandemic, focus and funding for child health in humanitarian settings suffers while children’s needs escalate. The future for children in humanitarian settings hangs in the balance, and platforms that raise the profile of humanitarian paediatrics are vital to ensure that these children are not overlooked and remain a priority among funders, decision-makers and stakeholders. The MSF Paediatric Days serve as a unique forum to advance knowledge on humanitarian paediatrics, and to create opportunities for individual and collective learning on this topic. We look forward to the next edition and welcome all suggestions for the next topics of the [MSF Paediatric Days](#).

**References**

1. United Nations Office for the Coordination of Humanitarian Affairs. Global Humanitarian Overview 2019 [Internet]. 2019. Available from: <https://reliefweb.int/sites/reliefweb.int/files/resources/GHO2019.pdf>
2. UNICEF. Levels and trends in Child Mortality Report 2018. 2018.
3. A.Spencer BW-K&. Reducing the Humanitarian financing gap: Review of progress since the report of the High-Level Panel on Humanitarian Financing. 2021.
4. Robertson T, Carter ED, Chou VB, Stegmuller AR, Jackson BD, Tam Y, et al. Early estimates of the indirect effects of the COVID-19 pandemic on maternal and child mortality in low-income and middle-income countries: a modelling study. Lancet Glob

- 1  
2  
3 Heal. 2020 May;0(0).  
4
- 5 5. Wagner Z, Heft-Neal S, Bhutta ZA, Black RE, Burke M, Bendavid E. Armed conflict and  
6 child mortality in Africa: a geospatial analysis. *Lancet* [Internet]. 2018;392(10150):857–  
7 65. Available from: [http://dx.doi.org/10.1016/S0140-6736\(18\)31437-5](http://dx.doi.org/10.1016/S0140-6736(18)31437-5)  
8
  - 9 6. Shenoda S, Kadir A, Pitterman S, Goldhagen J. The effects of armed conflict on children.  
10 *Pediatrics*. 2018;142(6).  
11
  - 12 7. Pfefferbaum B, Jacobs AK, Van Horn RL, Houston JB. Effects of Displacement in Children  
13 Exposed to Disasters. *Curr Psychiatry Rep*. 2016;18(8):1–5.  
14
  - 15 8. MSF Paediatric Working Group. Paediatric activities *Medecins Sans Frontieres*. 2019.  
16
  - 17 9. UNICEF, Save the Children WHO. Roadmap to Accelerate Progress for Every Newborn in  
18 Humanitarian Settings 2020 – 2025. 2020.  
19
  - 20 10. Jakobsen M, Sodemann M, Nylén G, Balé C, Nielsen J, Lisse I, et al. Breastfeeding status  
21 as a predictor of mortality among refugee children in an emergency situation in Guinea-  
22 Bissau. *Trop Med Int Heal*. 2003;8(11):992–6.  
23
  - 24 11. Hipgrave DB, Assefa F, Winoto A, Sukotjo S. Donated breast milk substitutes and  
25 incidence of diarrhoea among infants and young children after the May 2006  
26 earthquake in Yogyakarta and Central Java. *Public Health Nutr*. 03/23. 2011;15(2):307–  
27 15.  
28
  - 29 12. Shaker-Berbari L, Ghattas H, Symon AG, Anderson AS. Infant and young child feeding in  
30 emergencies: Organisational policies and activities during the refugee crisis in Lebanon.  
31 *Matern Child Nutr*. 2018 Jul;14(3):e12576.  
32
  - 33 13. Kanapathipillai R, Malou N, Hopman J, Bowman C, Yousef N, Michel J, et al. Antibiotic  
34 resistance in conflict settings: lessons learned in the Middle East. *JAC-Antimicrobial*  
35 *Resist*. 2019;1(1):2–4.  
36
  - 37 14. Langendorf C, Le Hello S, Moumouni A, Gouali M, Mamaty AA, Grais RF, et al. Enteric  
38 bacterial pathogens in children with diarrhea in niger: Diversity and antimicrobial  
39 resistance. *PLoS One*. 2015;10(3):1–18.  
40
  - 41 15. Okomo U, Senghore M, Darboe S, Bojang E, Zaman SMA, Hossain MJ, et al. Investigation  
42 of sequential outbreaks of *Burkholderia cepacia* and multidrug-resistant extended  
43 spectrum  $\beta$ -lactamase producing *Klebsiella* species in a West African tertiary hospital  
44 neonatal unit: a retrospective genomic analysis. *The Lancet Microbe* [Internet].  
45 2020;1(3):e119–29. Available from: [http://dx.doi.org/10.1016/S2666-5247\(20\)30061-6](http://dx.doi.org/10.1016/S2666-5247(20)30061-6)  
46
  - 47 16. Lenglet A, Faniyan O, Hopman J. A Nosocomial Outbreak of Clinical Sepsis in a Neonatal  
48 Care Unit (NCU) in Port-Au-Prince Haiti, July 2014 – September 2015. *PLoS Curr*.  
49 2018;(July 2014).  
50
  - 51 17. Johnson J, Akinboyo IC, Curless MS, Milstone AM, Coffin SE, Steeb DR. Saving neonatal  
52 lives by improving infection prevention in low-resource units: Tools are needed. *J Glob*  
53 *Health*. 2019;9(1):9–11.  
54
  - 55 18. Sidhu S. WHO and UNICEF warn of a decline in vaccinations during COVID-19. *World*  
56 *Health Organization*. 2020;  
57  
58  
59  
60

1  
2  
3  
4  
5  
6  
7  
8  
9  
10  
11  
12  
13  
14  
15  
16  
17  
18  
19  
20  
21  
22  
23  
24  
25  
26  
27  
28  
29  
30  
31  
32  
33  
34  
35  
36  
37  
38  
39  
40  
41  
42  
43  
44  
45  
46  
47  
48  
49  
50  
51  
52  
53  
54  
55  
56  
57  
58  
59  
60

Confidential: For Review Only

1  
2  
3  
4  
5  
6  
7  
8  
9  
10  
11  
12  
13  
14  
15  
16  
17  
18  
19  
20  
21  
22  
23  
24  
25  
26  
27  
28  
29  
30  
31  
32  
33  
34  
35  
36  
37  
38  
39  
40  
41  
42  
43  
44  
45  
46  
47  
48  
49  
50  
51  
52  
53  
54  
55  
56  
57  
58  
59  
60

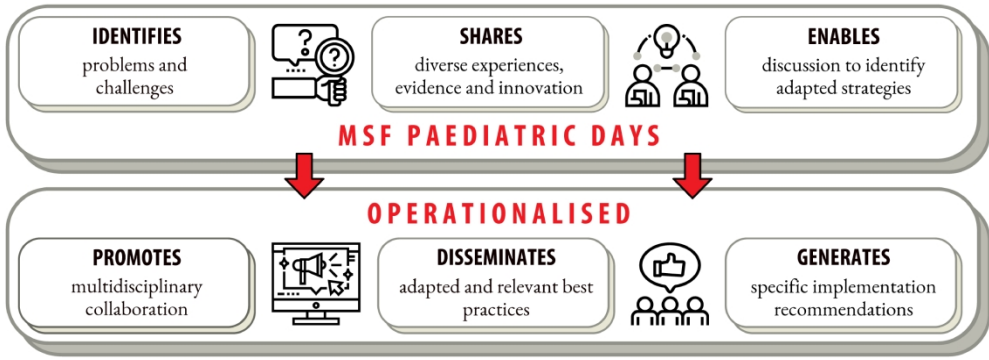

Supplement: bmjpo-2021-001156.draft_revisions.pdf [file bmjpo-2021-001156.draft_revisions.pdf]
