# Supplementary material for: MSF Paediatric Days: a step forward in operationalising ‘Humanitarian Paediatrics’
Source: PubMed Central journal article supplement — BMJ Paediatr Open. 2021 Sep 27;5(1):e001156. doi: 10.1136/bmjpo-2021-001156 (PMC8477328; doi:10.1136/bmjpo-2021-001156), 2021-09-27
Supplement: bmjpo-2021-001156.reviewer_comments.pdf [file bmjpo-2021-001156.reviewer_comments.pdf]

## PEER REVIEW HISTORY

BMJ Paediatrics Open publishes all reviews undertaken for accepted manuscripts. Reviewers are asked to complete a checklist review form and are provided with free text boxes to elaborate on their assessment. These free text comments are reproduced below.

### ARTICLE DETAILS

|                            |                                                                                                                                                                                                                                   |
|----------------------------|-----------------------------------------------------------------------------------------------------------------------------------------------------------------------------------------------------------------------------------|
| <b>TITLE (PROVISIONAL)</b> | MSF Paediatric days: A step forward in operationalising 'Humanitarian Paediatrics'                                                                                                                                                |
| <b>AUTHORS</b>             | Janet, Sophie<br>Russell, Neal<br>Morton, Nikola<br>Martinez, Daniel<br>Tamannai, Mona<br>Lafferty, Nadia<br>roggeveen, harriet<br>Ogundipe, Oluwakemi<br>Carreras, Inmaculada<br>Gao, Anja<br>Didier, Elise<br>Petrucci, Roberta |

### VERSION 1 – REVIEW

|                        |                                                                                                                                                               |
|------------------------|---------------------------------------------------------------------------------------------------------------------------------------------------------------|
| <b>REVIEWER</b>        | Reviewer name: Laurent Hiffler<br>Institution and Country: Lagny sur Marne, United Kingdom of Great Britain and Northern Ireland<br>Competing interests: None |
| <b>REVIEW RETURNED</b> | 12-Jul-2021                                                                                                                                                   |

|                         |                                                                                                                                                                                                                                                                                                                                                                                                                                        |
|-------------------------|----------------------------------------------------------------------------------------------------------------------------------------------------------------------------------------------------------------------------------------------------------------------------------------------------------------------------------------------------------------------------------------------------------------------------------------|
| <b>GENERAL COMMENTS</b> | Interesting presentation of what are the MSF paediatric days with focus on the latest edition. Relevant topics. would be good to know if there is a date/year for future edition at the end of the paper when call for interest.<br>p6 line 49 : a reference is missing.<br>p7 line 16 : please define for the reader what is SIPCA tool<br>Finally please, for the unfamiliar reader define the concept of "humanitarian paediatrics" |
|-------------------------|----------------------------------------------------------------------------------------------------------------------------------------------------------------------------------------------------------------------------------------------------------------------------------------------------------------------------------------------------------------------------------------------------------------------------------------|

|                        |                                                                                                                                                                           |
|------------------------|---------------------------------------------------------------------------------------------------------------------------------------------------------------------------|
| <b>REVIEWER</b>        | Reviewer name: Lorena Suárez-Idueta<br>Institution and Country: Carlos Slim Foundation, United Kingdom of Great Britain and Northern Ireland<br>Competing interests: None |
| <b>REVIEW RETURNED</b> | 08-Jul-2021                                                                                                                                                               |

|                         |                                                                                                                                                                                                                                                                                                                                                                                                                                                                                                                                                                                                                                                                                                                                                                                                                                                   |
|-------------------------|---------------------------------------------------------------------------------------------------------------------------------------------------------------------------------------------------------------------------------------------------------------------------------------------------------------------------------------------------------------------------------------------------------------------------------------------------------------------------------------------------------------------------------------------------------------------------------------------------------------------------------------------------------------------------------------------------------------------------------------------------------------------------------------------------------------------------------------------------|
| <b>GENERAL COMMENTS</b> | I have found a relevant and innovative topic to support paediatric health in humanitarian settings.<br>I would recommend minor revisions as follows:<br>In line 40, I would suggest including an explicit definition of "Humanitarian Paediatrics" to clarify if this definition has been used in the past or even better if this definition has been suggested by MSF especially if authors are advocating for recognition, visibility, funding, better measurement, description, prevention and treatment of paediatric medical conditions across humanitarian settings.<br>Also, I would suggest including a figure to help the reader to better understand the process from which the MSF paediatric days can contribute to operationalizing the concept of "Humanitarian Paediatrics", for example, generating scientific evidence regarding |
|-------------------------|---------------------------------------------------------------------------------------------------------------------------------------------------------------------------------------------------------------------------------------------------------------------------------------------------------------------------------------------------------------------------------------------------------------------------------------------------------------------------------------------------------------------------------------------------------------------------------------------------------------------------------------------------------------------------------------------------------------------------------------------------------------------------------------------------------------------------------------------------|

|  |                                                                                                                                                                                                                                                                                                                                                                                                                                                                                                                                                                                                                                                                                                                                                                                     |
|--|-------------------------------------------------------------------------------------------------------------------------------------------------------------------------------------------------------------------------------------------------------------------------------------------------------------------------------------------------------------------------------------------------------------------------------------------------------------------------------------------------------------------------------------------------------------------------------------------------------------------------------------------------------------------------------------------------------------------------------------------------------------------------------------|
|  | <p>the implementation of health strategies, enabling high-level discussions with a variety of actors to raise awareness and promote coordinated efforts, disseminating best practices to support clinical decisions, etc.</p> <p>In line 57, please feel free to expand a bit regarding MSF eCare project, Telemedicine and POCUS, you can explain for external readers, those who might not be very familiar with MSF initiatives, their aim and why they matter for patients and front line staff.</p> <p>In line 57, please note that the link of telemedicine will redirect the reader to a website in Spanish, given that you are submitting an academic paper in English, maybe you want to be consistent and select a website in English (if this is possible/available)</p> |
|--|-------------------------------------------------------------------------------------------------------------------------------------------------------------------------------------------------------------------------------------------------------------------------------------------------------------------------------------------------------------------------------------------------------------------------------------------------------------------------------------------------------------------------------------------------------------------------------------------------------------------------------------------------------------------------------------------------------------------------------------------------------------------------------------|

|                        |                                                                                                                                       |
|------------------------|---------------------------------------------------------------------------------------------------------------------------------------|
| <b>REVIEWER</b>        | Reviewer name: Dr. Raul Gerardo Mercer<br>Institution and Country: Social Sciences and Health, Argentina<br>Competing interests: None |
| <b>REVIEW RETURNED</b> | 19-Jul-2021                                                                                                                           |

|                         |                                                                                                                                                                                                                                                                                                                                                                                                                                                                                                                                                                                                                                                                                                   |
|-------------------------|---------------------------------------------------------------------------------------------------------------------------------------------------------------------------------------------------------------------------------------------------------------------------------------------------------------------------------------------------------------------------------------------------------------------------------------------------------------------------------------------------------------------------------------------------------------------------------------------------------------------------------------------------------------------------------------------------|
| <b>GENERAL COMMENTS</b> | <p>It is a manuscript with a narrative that describes the operationalization of Humanitarian Pediatrics, based on the work developed by Medicine Sans Frontiers (MSF).</p> <p>The document also highlights the meaning of MSF Pediatric Days not only as a meeting space, but also on the importance of partnerships with different organizations (UN, NGO, GO), the territorial extension of activities, the importance of guaranteeing access and continuity in care. The value of generating evidence from practices is also highlighted.</p> <p>In the Antimicrobial resistance section, you must add the corresponding reference number.</p> <p>The work is in condition to be published</p> |
|-------------------------|---------------------------------------------------------------------------------------------------------------------------------------------------------------------------------------------------------------------------------------------------------------------------------------------------------------------------------------------------------------------------------------------------------------------------------------------------------------------------------------------------------------------------------------------------------------------------------------------------------------------------------------------------------------------------------------------------|

### VERSION 1 – AUTHOR RESPONSE

Dear Prof. Imti Choonara,

We are grateful to you and the reviewers for your helpful comments and have modified our manuscript to take account of the suggestions. We believe the manuscript has been improved as a result of these adjustments. We enclose one manuscript and a copy with highlighted changes and the responses to the reviewers below.

Kind regards,

Dr Sophie Janet

#### REVIEWERS COMMENTS:

Editor in Chief Comments to Author :

The paper is currently all text. Can I suggest adding a couple of tables/boxes:

Para 2 re paediatric work of MSF add a table giving these numbers and reduce the text

Para 5 re 5 themes add a table of these 5 themes with another column of recommendations for each theme, eg essential newborn care - promote breastfeeding

add the Figure suggested by reviewer 1

We thank the editor in chief for the comment. We have substitute paragraph 2 by a table, integrated a figure as suggested by reviewer 1 and added on the supplemental information the key messages of the 5 themes with their respective recommendations.

Additionally, an internal MSF editor has reviewed the manuscript and provided minor corrections on

language and style that have been incorporated on the final manuscript.

Reviewer: 1

Lorena Suárez-Idueta , Carlos Slim Foundation

**Comments to the Author**

I have found a relevant and innovative topic to support paediatric health in humanitarian settings.

I would recommend minor revisions as follows:

In line 40, I would suggest including an explicit definition of "Humanitarian Paediatrics" to clarify if this definition has been used in the past or even better if this definition has been suggested by MSF especially if authors are advocating for recognition, visibility, funding, better measurement, description, prevention and treatment of paediatric medical conditions across humanitarian settings.

Also, I would suggest including a figure to help the reader to better understand the process from which the MSF paediatric days can contribute to operationalizing the concept of "Humanitarian Paediatrics", for example, generating scientific evidence regarding the implementation of health strategies, enabling high-level discussions with a variety of actors to raise awareness and promote coordinated efforts, disseminating best practices to support clinical decisions, etc.

In line 57, please feel free to expand a bit regarding MSF eCare project, Telemedicine and POCUS, you can explain for external readers, those who might not be very familiar with MSF initiatives, their aim and why they matter for patients and front line staff.

In line 57, please note that the link of telemedicine will redirect the reader to a website in Spanish, given that you are submitting an academic paper in English, maybe you want to be consistent and select a website in English (if this is possible/available)

We thank the reviewer for her relevant comments and suggestions. Please find below answers to each point raised:

1. We have included a footnote (see below) with a proposed definition of Human pediatrics.

"Humanitarian paediatrics refers to the branch of medicine that involves the care of newborns, infants, children, and adolescents in humanitarian settings. It takes elements from public and global health, paediatrics, tropical and disaster medicine. It is centred on the child and his family and integrates the specific challenges and barriers related to the humanitarian contexts and limited resources".

2. We have incorporated a figure that illustrates how MSF paediatric days can contribute to operationalizing the concept of "Humanitarian Paediatrics" (see figure 1) and a new paragraph introducing the figure.

3. We have provided a brief definition of the 3 internal MSF initiatives: eCARE, Telemedicine, POCUS. However, we haven't expand much, as it out of the scope of this manuscript. The links related to these 3 initiatives have been reviewed and they are all redirecting to an English websites. MSF websites are available in different languages, which might be displayed in a specific language depending on the browser configuration.

Reviewer: 2

Laurent Hiffler, Lagny sur Marne

**Comments to the Author**

Interesting presnetation of what are the MSF paediatric days with focus on the latest edition. Relevent topics. would be good to know if there is a date/year for future edition at the end of the paper when call for interest.

p6 line 49 : a reference is missing.

p7 line 16 : please define for the reader what is SIPCA tool

Finally please, for the unfamiliar reader define the concept of "humanitarian paediatrics"

Thank you for the reviewer for his interest and comment. Unfortunately, we don't have a fixed date already available for the next edition. All information regarding the next edition will be available on the MSF paediatric Days website on its due time.

We apologise for the missing reference, the appropriate references have been added.

We have removed the word SIPCA tool, which is an internal MSF tool to analyse and design an action plan at project level for the Infection, Prevention and Control activities. The acronym SIPCA refers to Stepwise Infection Prevention and Control Approach.

Finally, a definition of Humanitarian paediatrics has been added in a footnote:

“Humanitarian paediatrics refers to the branch of medicine that involves the care of newborns, infants, children, and adolescents in humanitarian settings. It takes elements from public and global health, paediatrics, tropical and disaster medicine. It is centred on the child and his family and integrates the specific challenges and barriers related to the humanitarian contexts and limited resources”.

Reviewer: 3

Dr. Raul Mercer

**Comments to the Author**

It is a manuscript with a narrative that describes the operationalization of Humanitarian Pediatrics, based on the work developed by Medicine Sans Frontiers (MSF).

The document also highlights the meaning of MSF Pediatric Days not only as a meeting space, but also on the importance of partnerships with different organizations (UN, NGO, GO), the territorial extension of activities, the importance of guaranteeing access and continuity in care. The value of generating evidence from practices is also highlighted.

In the Antimicrobial resistance section, you must add the corresponding reference number.

Thank you for your pertinent observation. We apologise for the missing reference. It has been added.
